# Supplementary material for: A FRET sensor of C-terminal movement reveals VRAC activation by plasma membrane DAG signaling rather than ionic strength
Source: eLife journal article supplement (doi:10.7554/elife.45421), 2019-06-17
Supplement: supp [file elife-45421-supp-v1.zip]

Archive with 15 entries (15 files):
- elife_poa_e45421_Figure_4_figure_supplement_1.pdf
- elife_poa_e45421_Figure_2_video_1.avi
- elife_poa_e45421_Figure_1_figure_supplement_1.pdf
- elife_poa_e45421_Figure_3_figure_supplement_2.pdf
- elife_poa_e45421_Figure_3_source_data_1.docx
- elife_poa_e45421_Figure_3_figure_supplement_1.pdf
- elife_poa_e45421_Figure_5_figure_supplement_1.pdf
- elife_poa_e45421_Transparent_Reporting_File.pdf
- elife_poa_e45421_Figure_1_figure_supplement_2.pdf
- elife_poa_e45421_Figure_2_source_data_1.docx
- elife_poa_e45421_Figure_1_source_data_1.docx
- elife_poa_e45421_Figure_4_source_data_1.docx
- elife_poa_e45421_Figure_5_source_data_1.docx
- elife_poa_e45421_Figure_3_video_1.avi
- elife_poa_e45421_Figure_4_figure_supplement_2.pdf
