# Supplementary material for: A FRET sensor of C-terminal movement reveals VRAC activation by plasma membrane DAG signaling rather than ionic strength
Source: eLife journal article supplement (doi:10.7554/elife.45421), 2019-06-17
Supplement: supp [file elife-45421-supp-v1.zip › elife_poa_e45421_Figure_2_source_data_1.docx]

Figure 2–source data 1. Statistics of hypotonicity-induced FRET changes. The statistics in the Table accompany data in Figure 2D.

Normalized cFRET (Figure 2D):

|  | ER | noGlyc PM |
| --- | --- | --- |
| mean: | 1.00 | 0.93 |
| s.e.m.: | 0.01 | 0.01 |
| *cells:* | *23* | *21* |
| n (dishes): | 16 | 7 |
| p (vs. Iso) | 0.8 | 0.00019 |
