# Supplementary material for: A FRET sensor of C-terminal movement reveals VRAC activation by plasma membrane DAG signaling rather than ionic strength
Source: eLife journal article supplement (doi:10.7554/elife.45421), 2019-06-17

**A**

HEK KO A-CFP/E-YFP, whole-cell patch

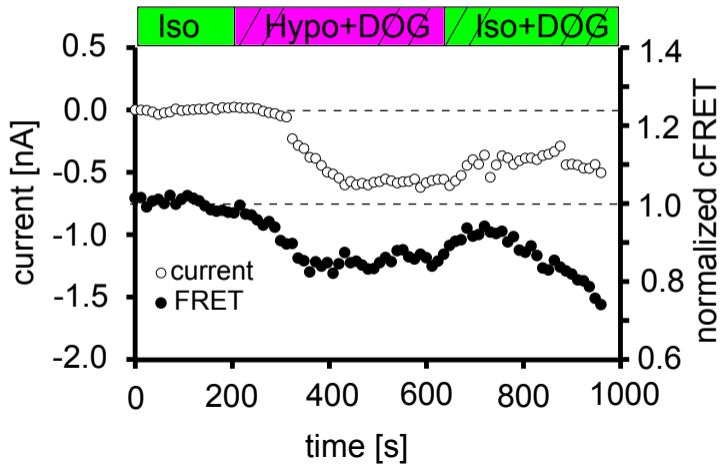

HEK endogenous VRAC, whole-cell patch

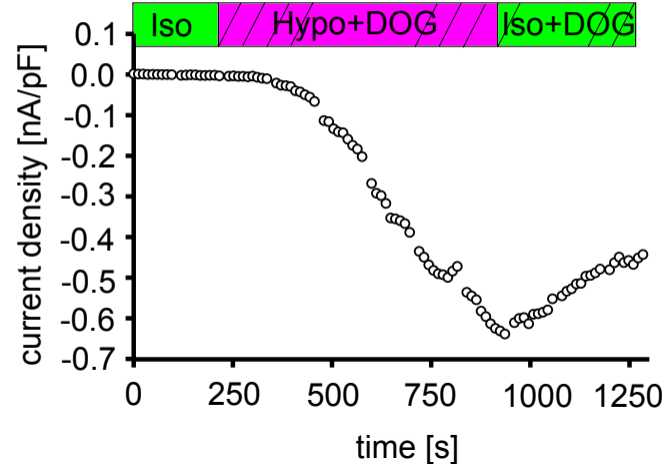**B**

HeLa A-CFP/E-YFP, without whole-cell patch

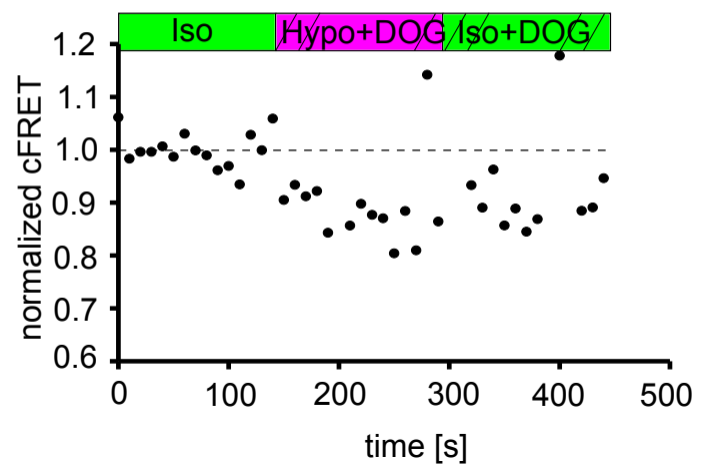

Supplement: supp [file elife-45421-supp-v1.zip › elife_poa_e45421_Figure_5_figure_supplement_1.pdf]
