# Supplementary figures and images for: A FRET sensor of C-terminal movement reveals VRAC activation by plasma membrane DAG signaling rather than ionic strength
Source: eLife journal article supplement (doi:10.7554/elife.45421), 2019-06-17

**A**

CFP-18aa-YFP

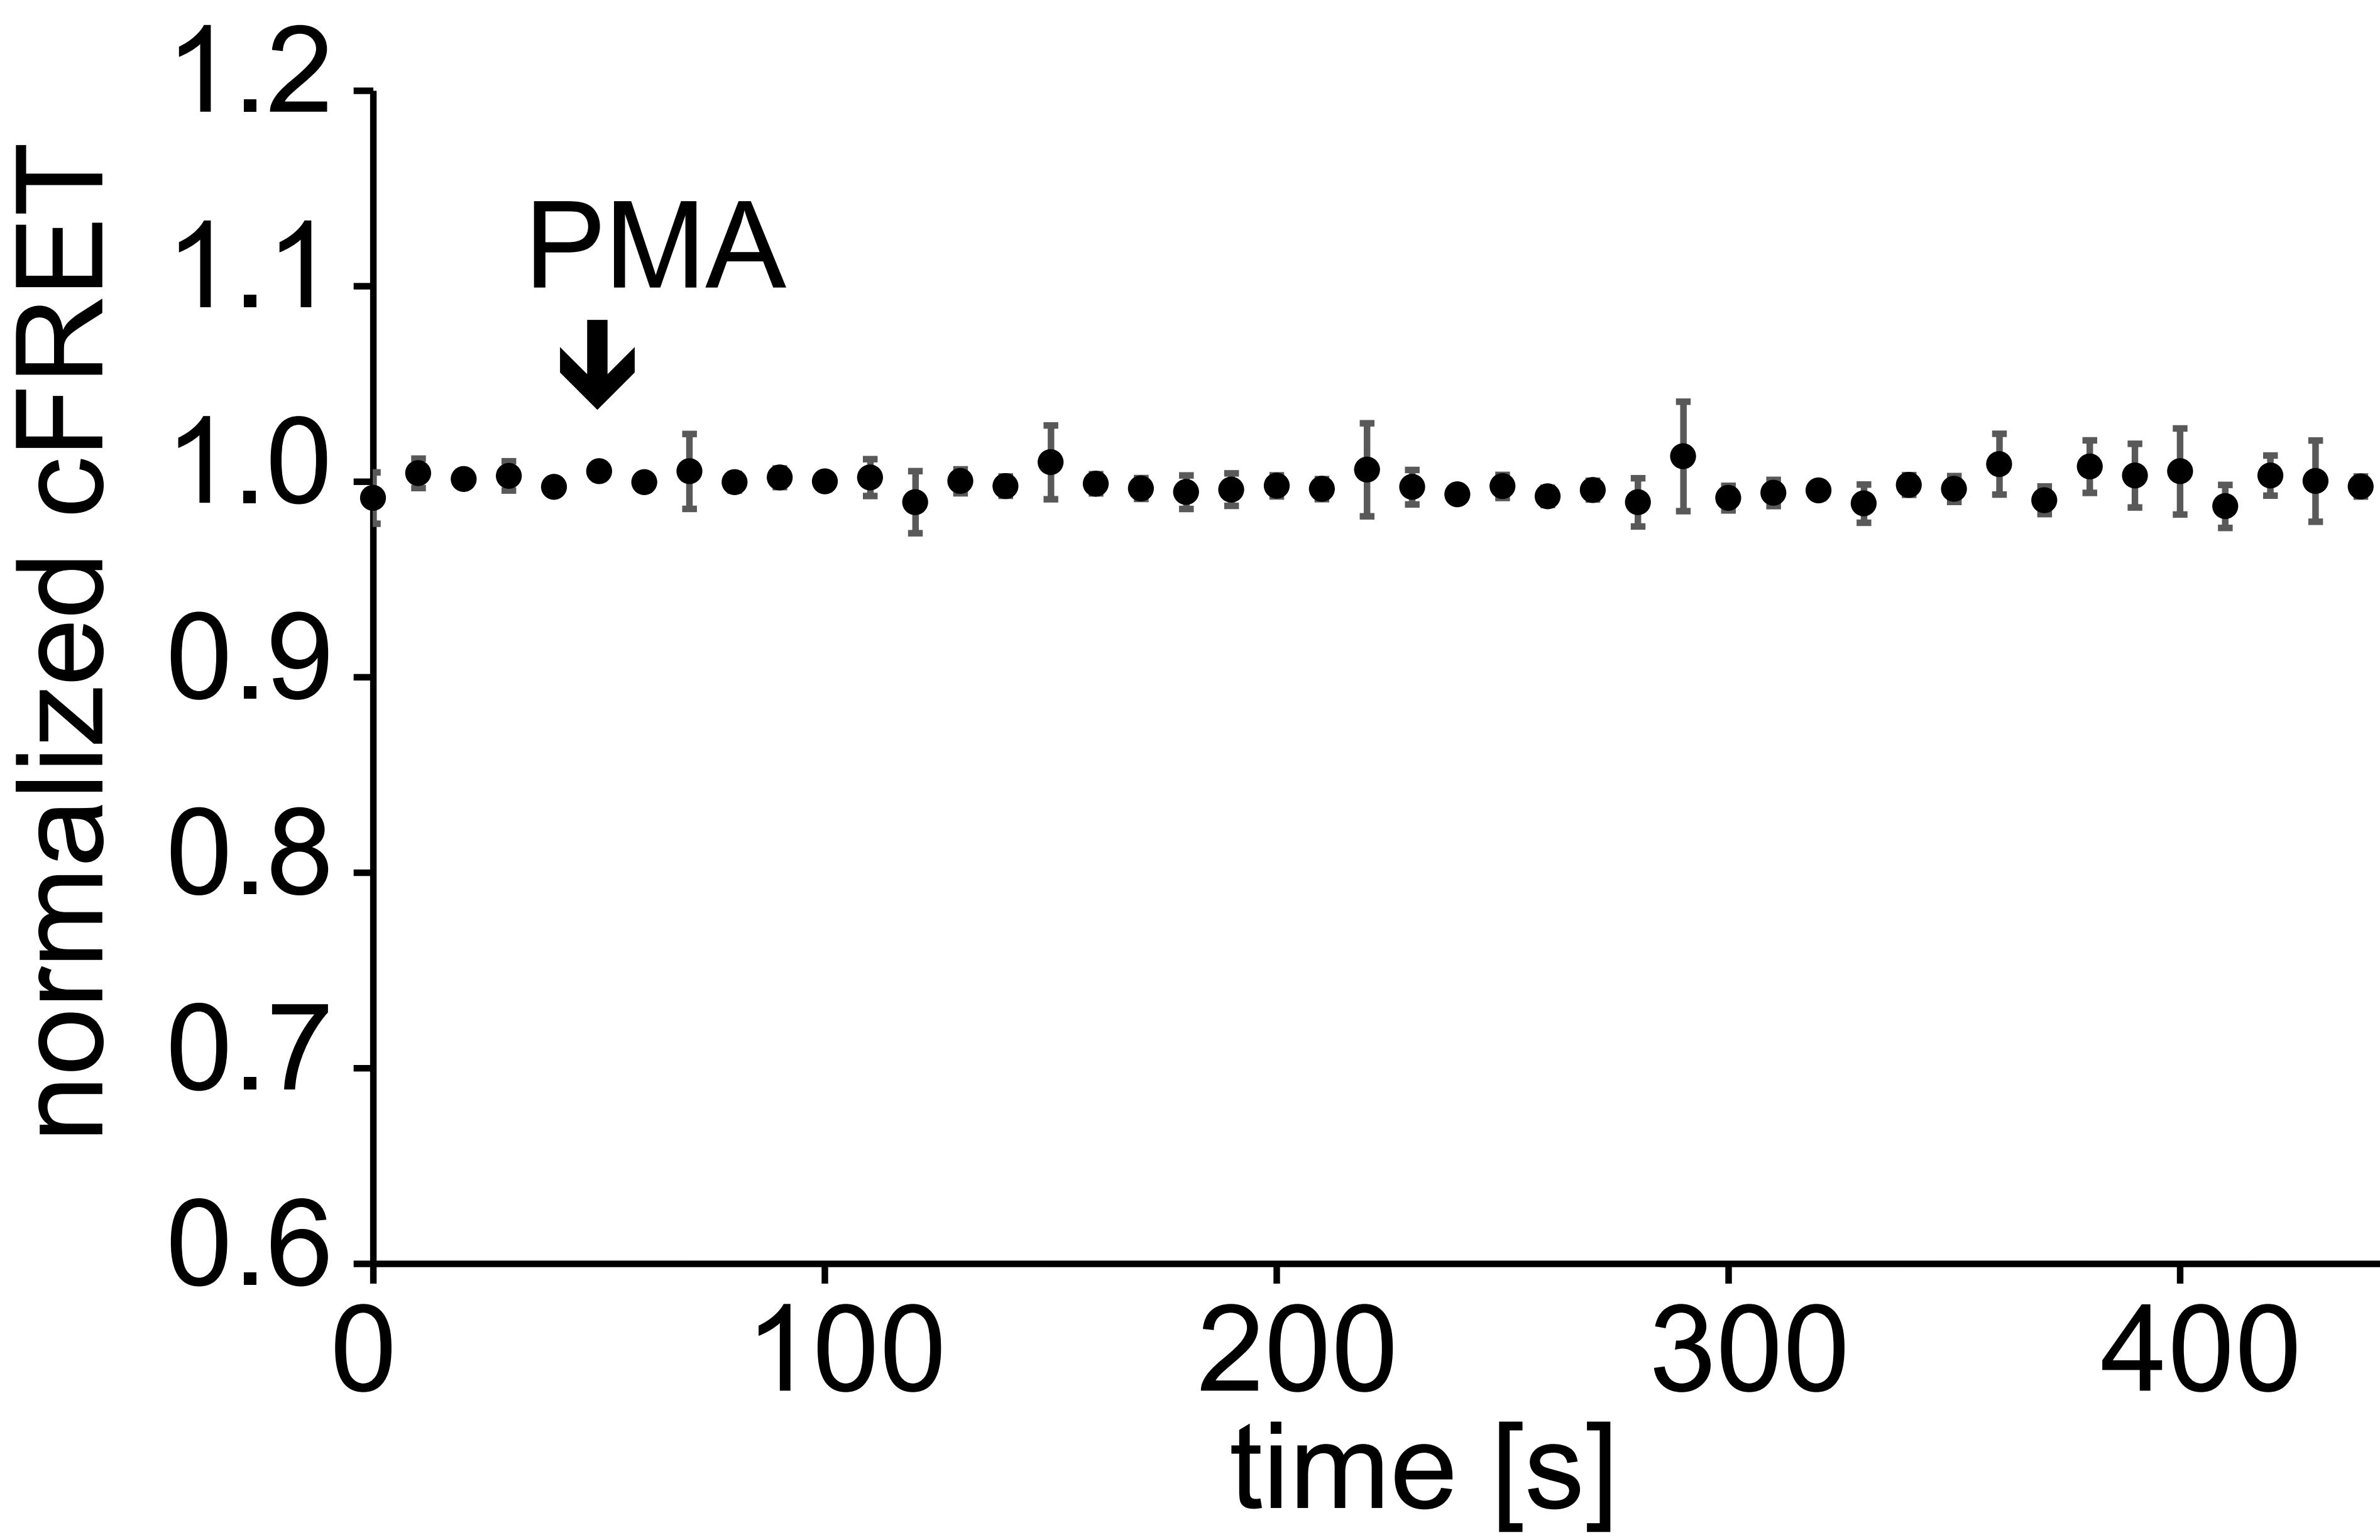**B**

A-CFP/E-YFP

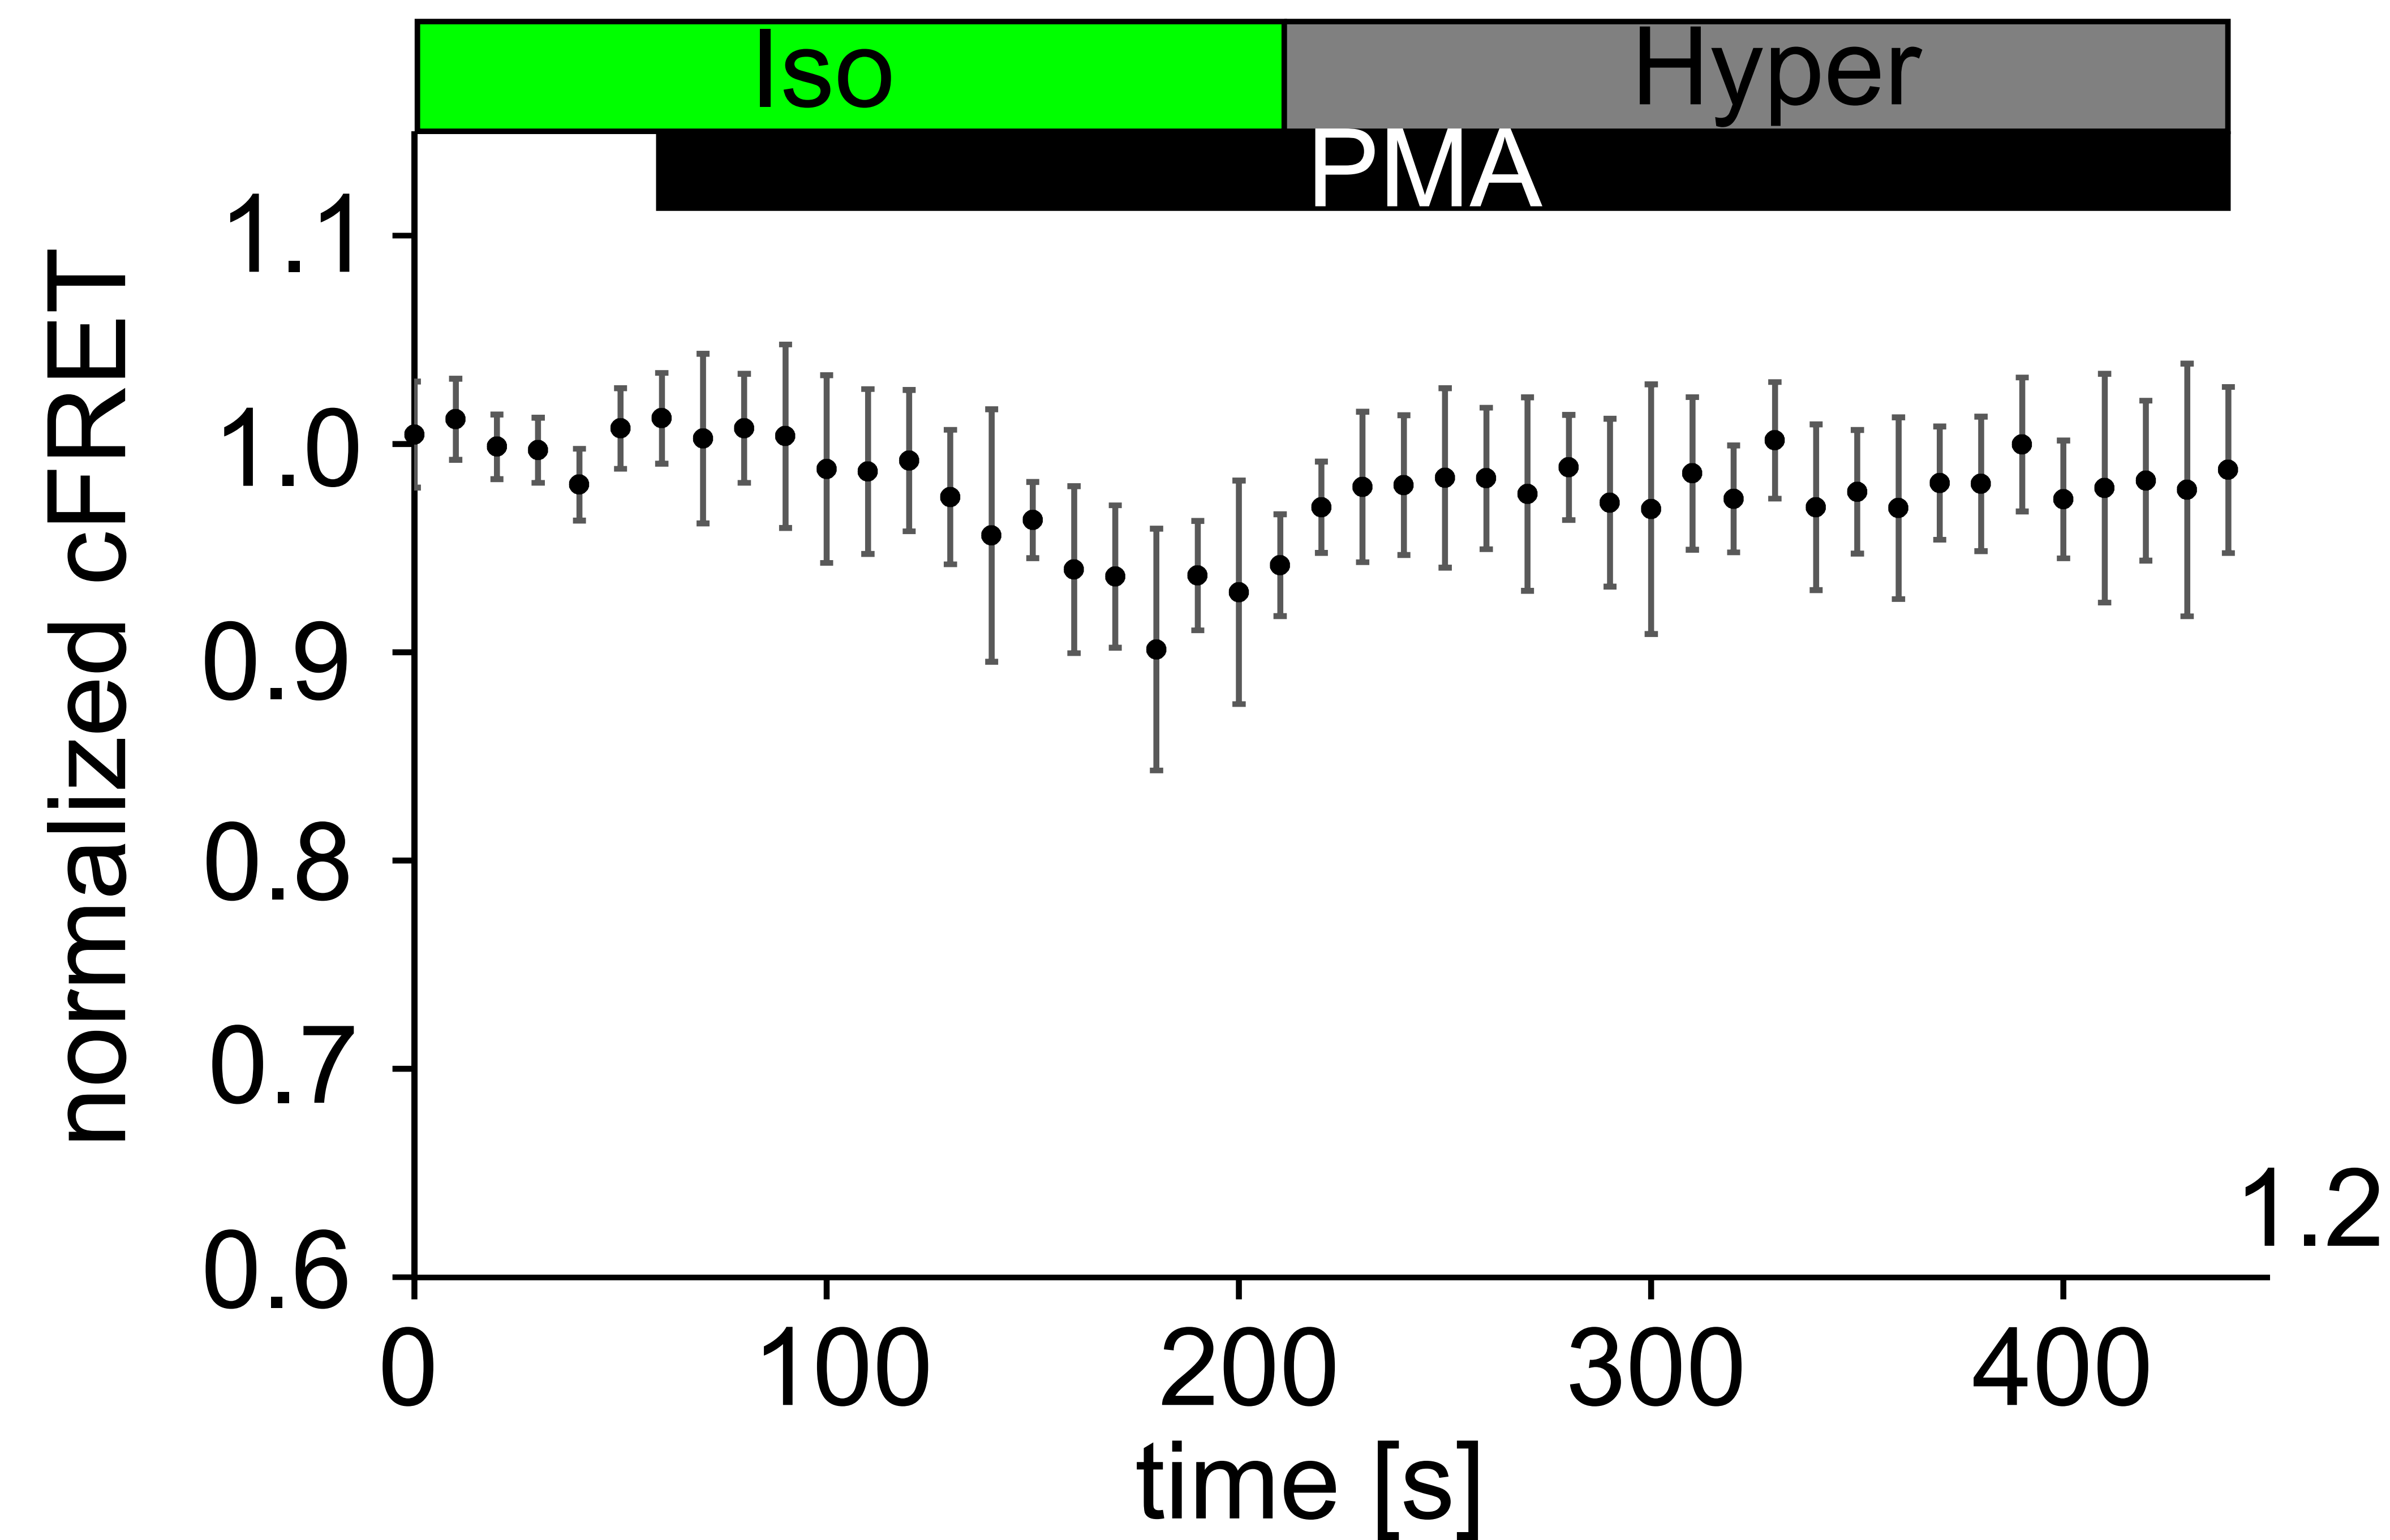**C**A-CFP FM<sub>2</sub>/E-YFP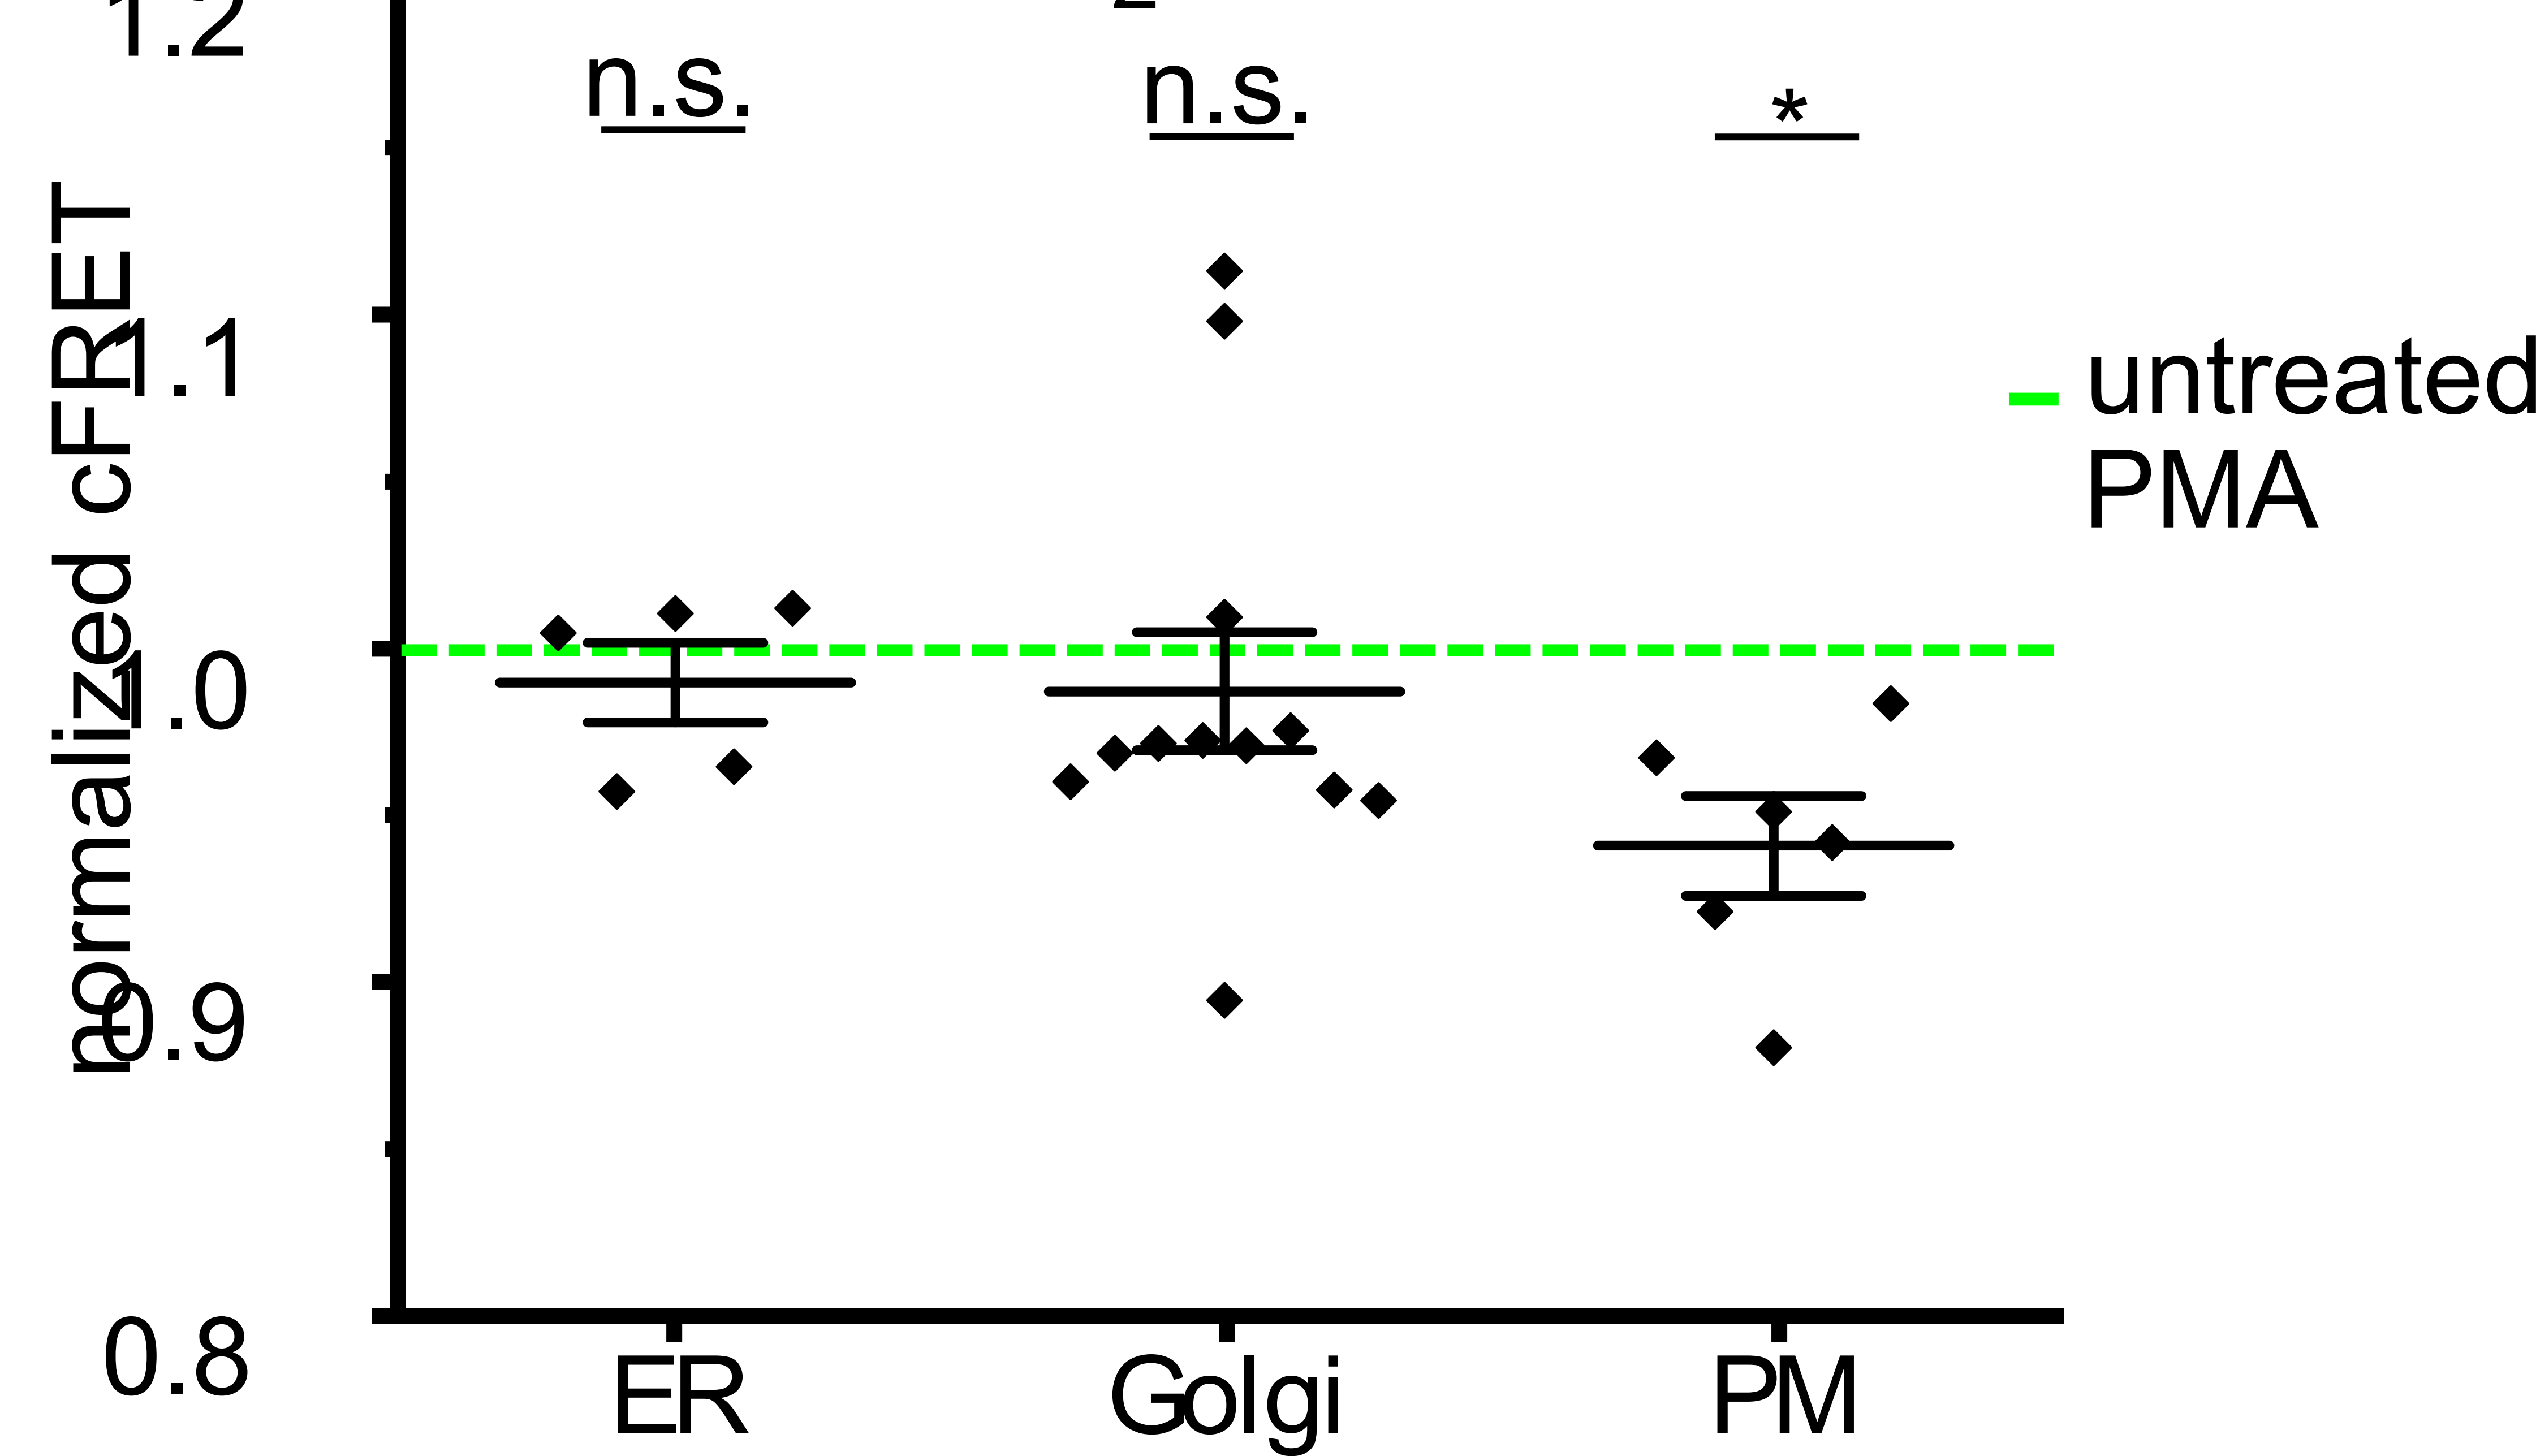

Supplement: supp [file elife-45421-supp-v1.zip › elife_poa_e45421_Figure_4_figure_supplement_1.pdf]

A-CFP/A-YFP

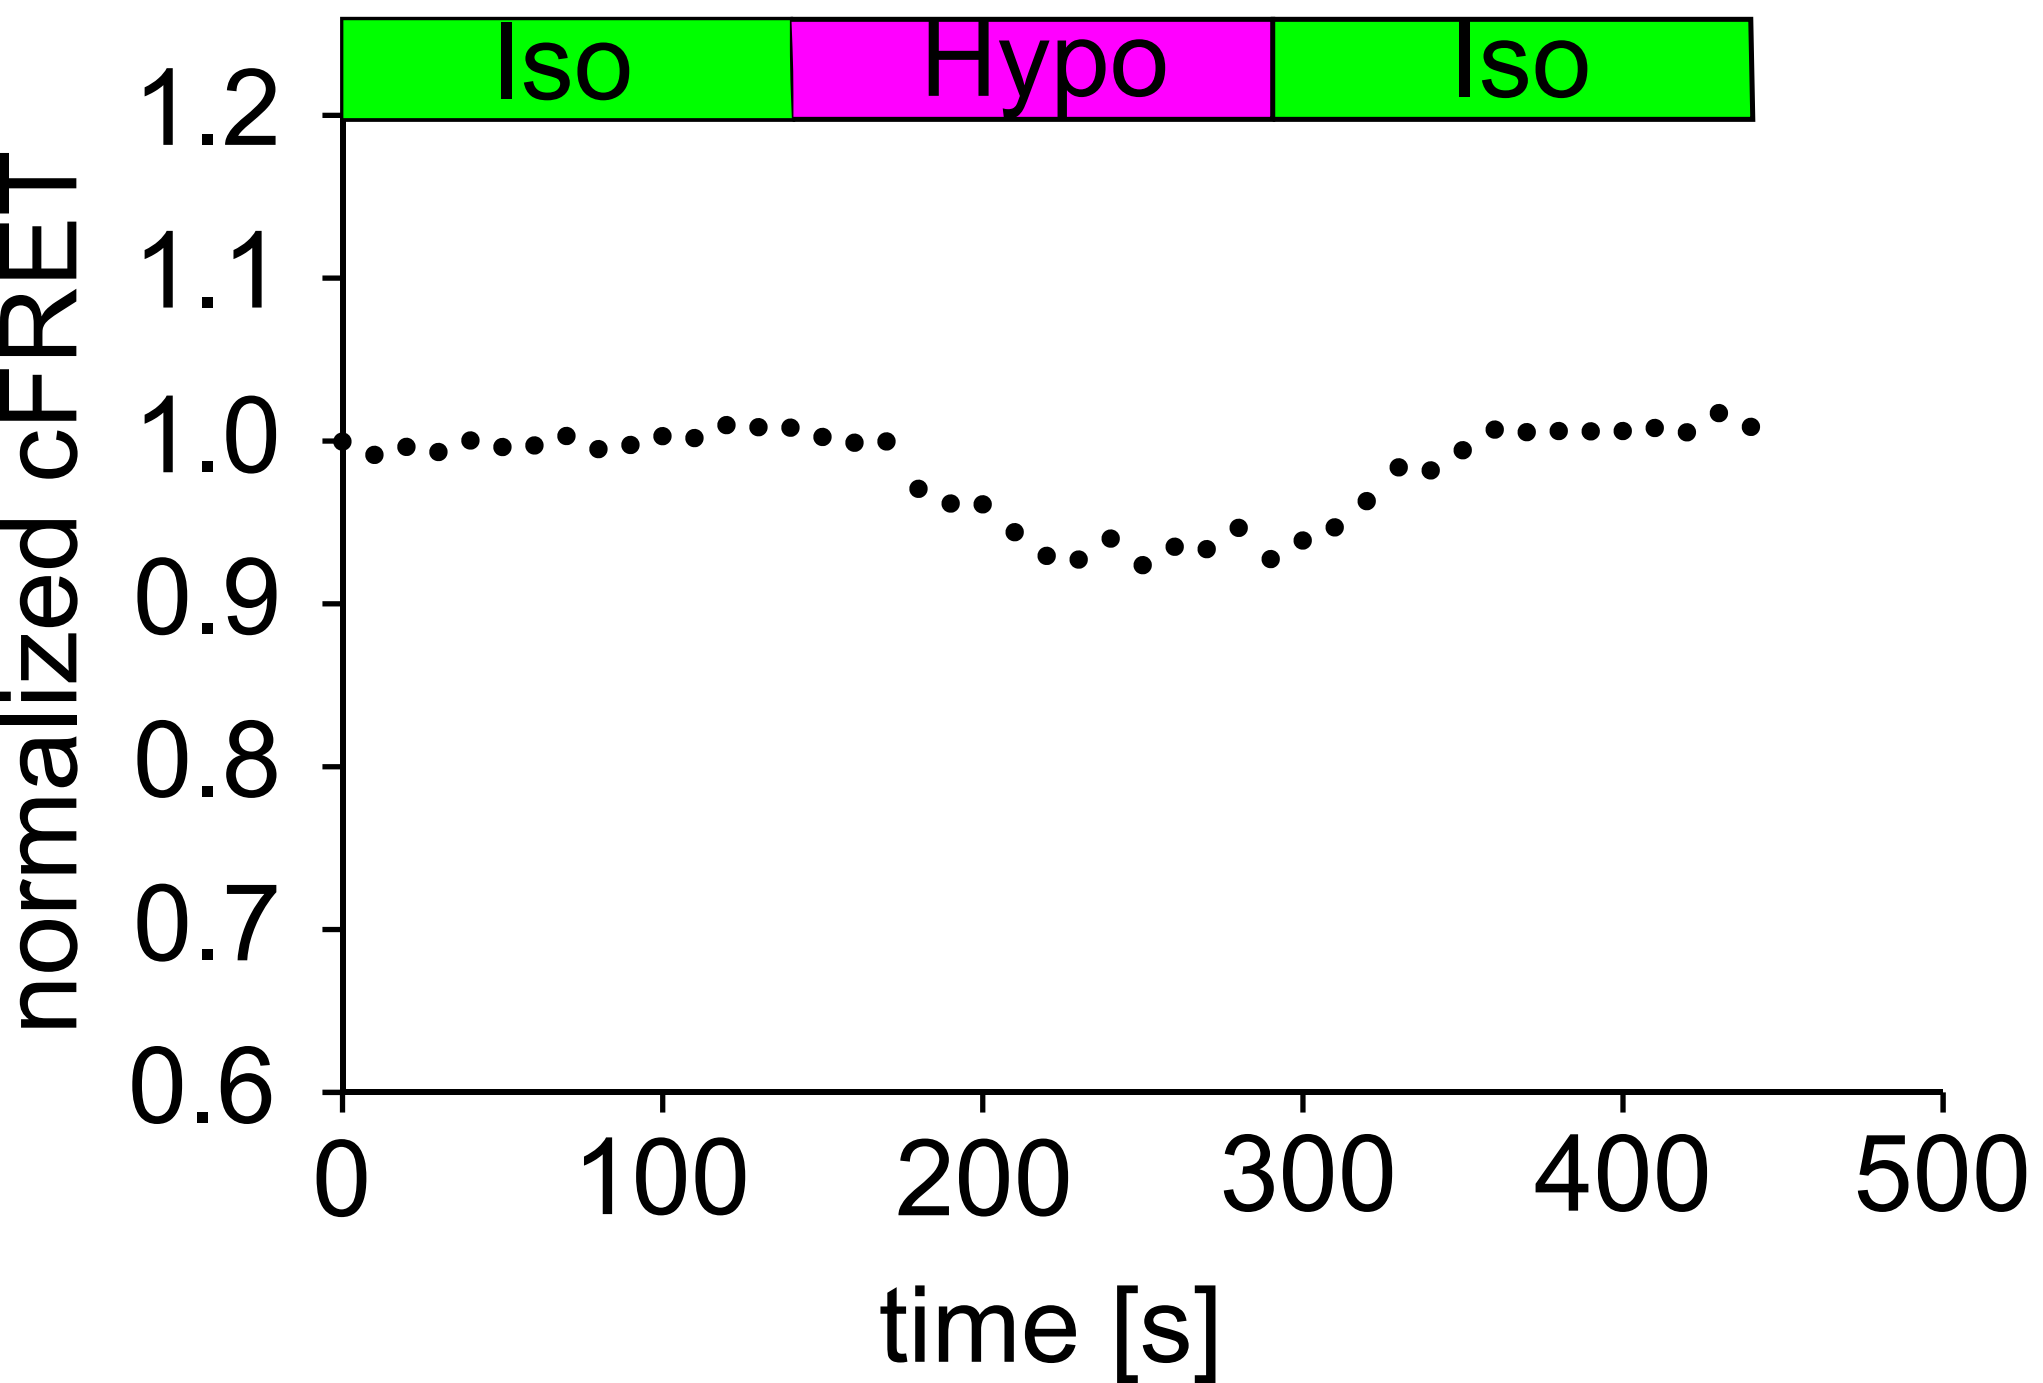

GluA2-6Y-10C

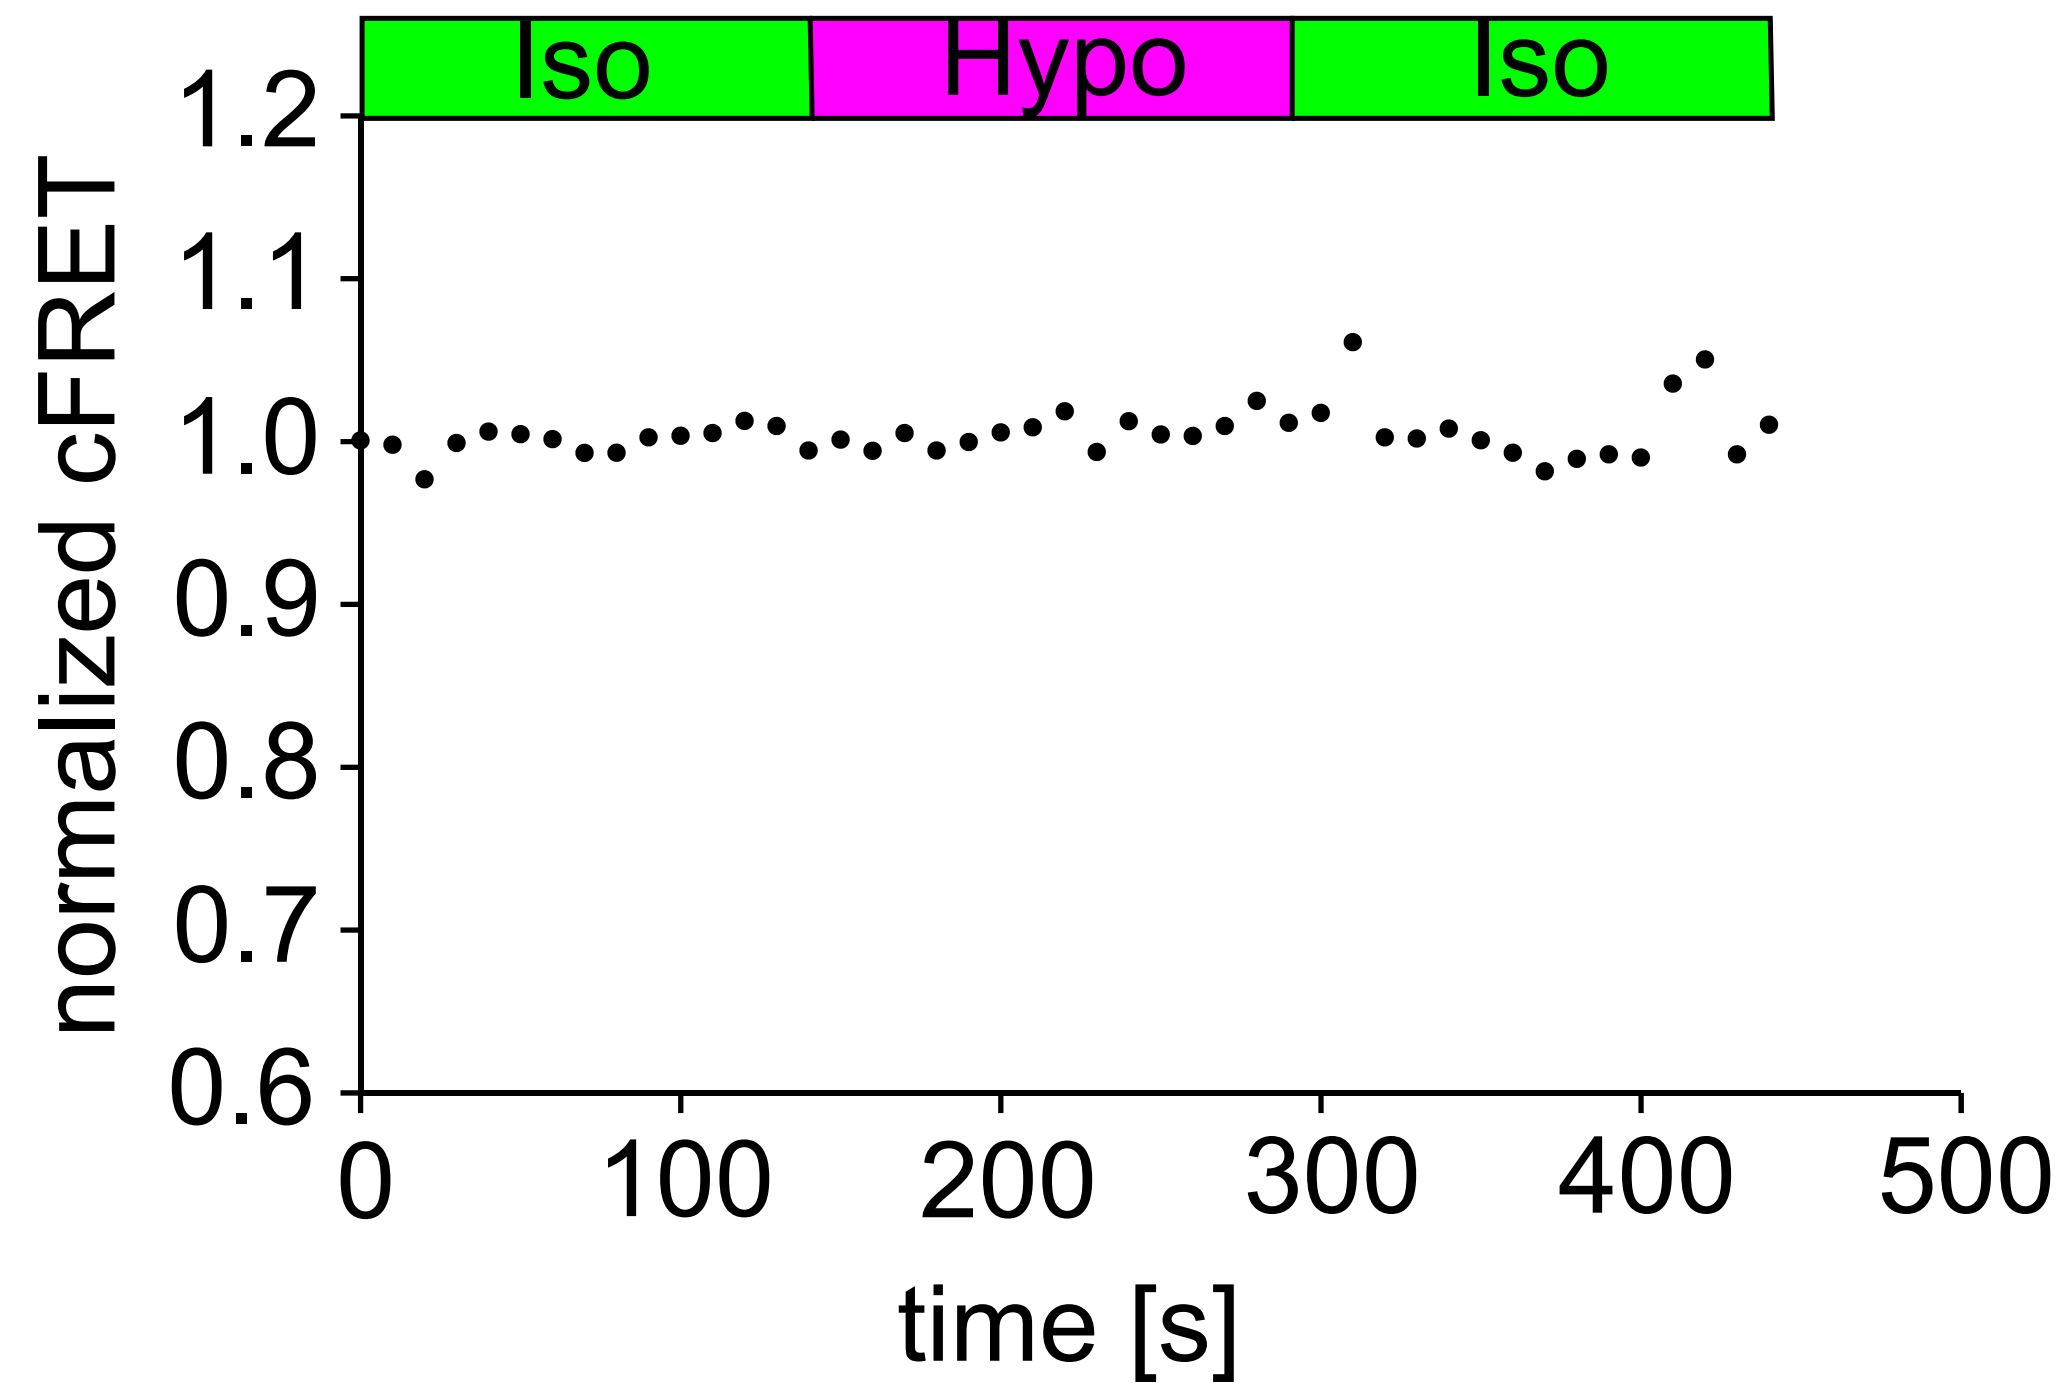

CFP-18aa-YFP

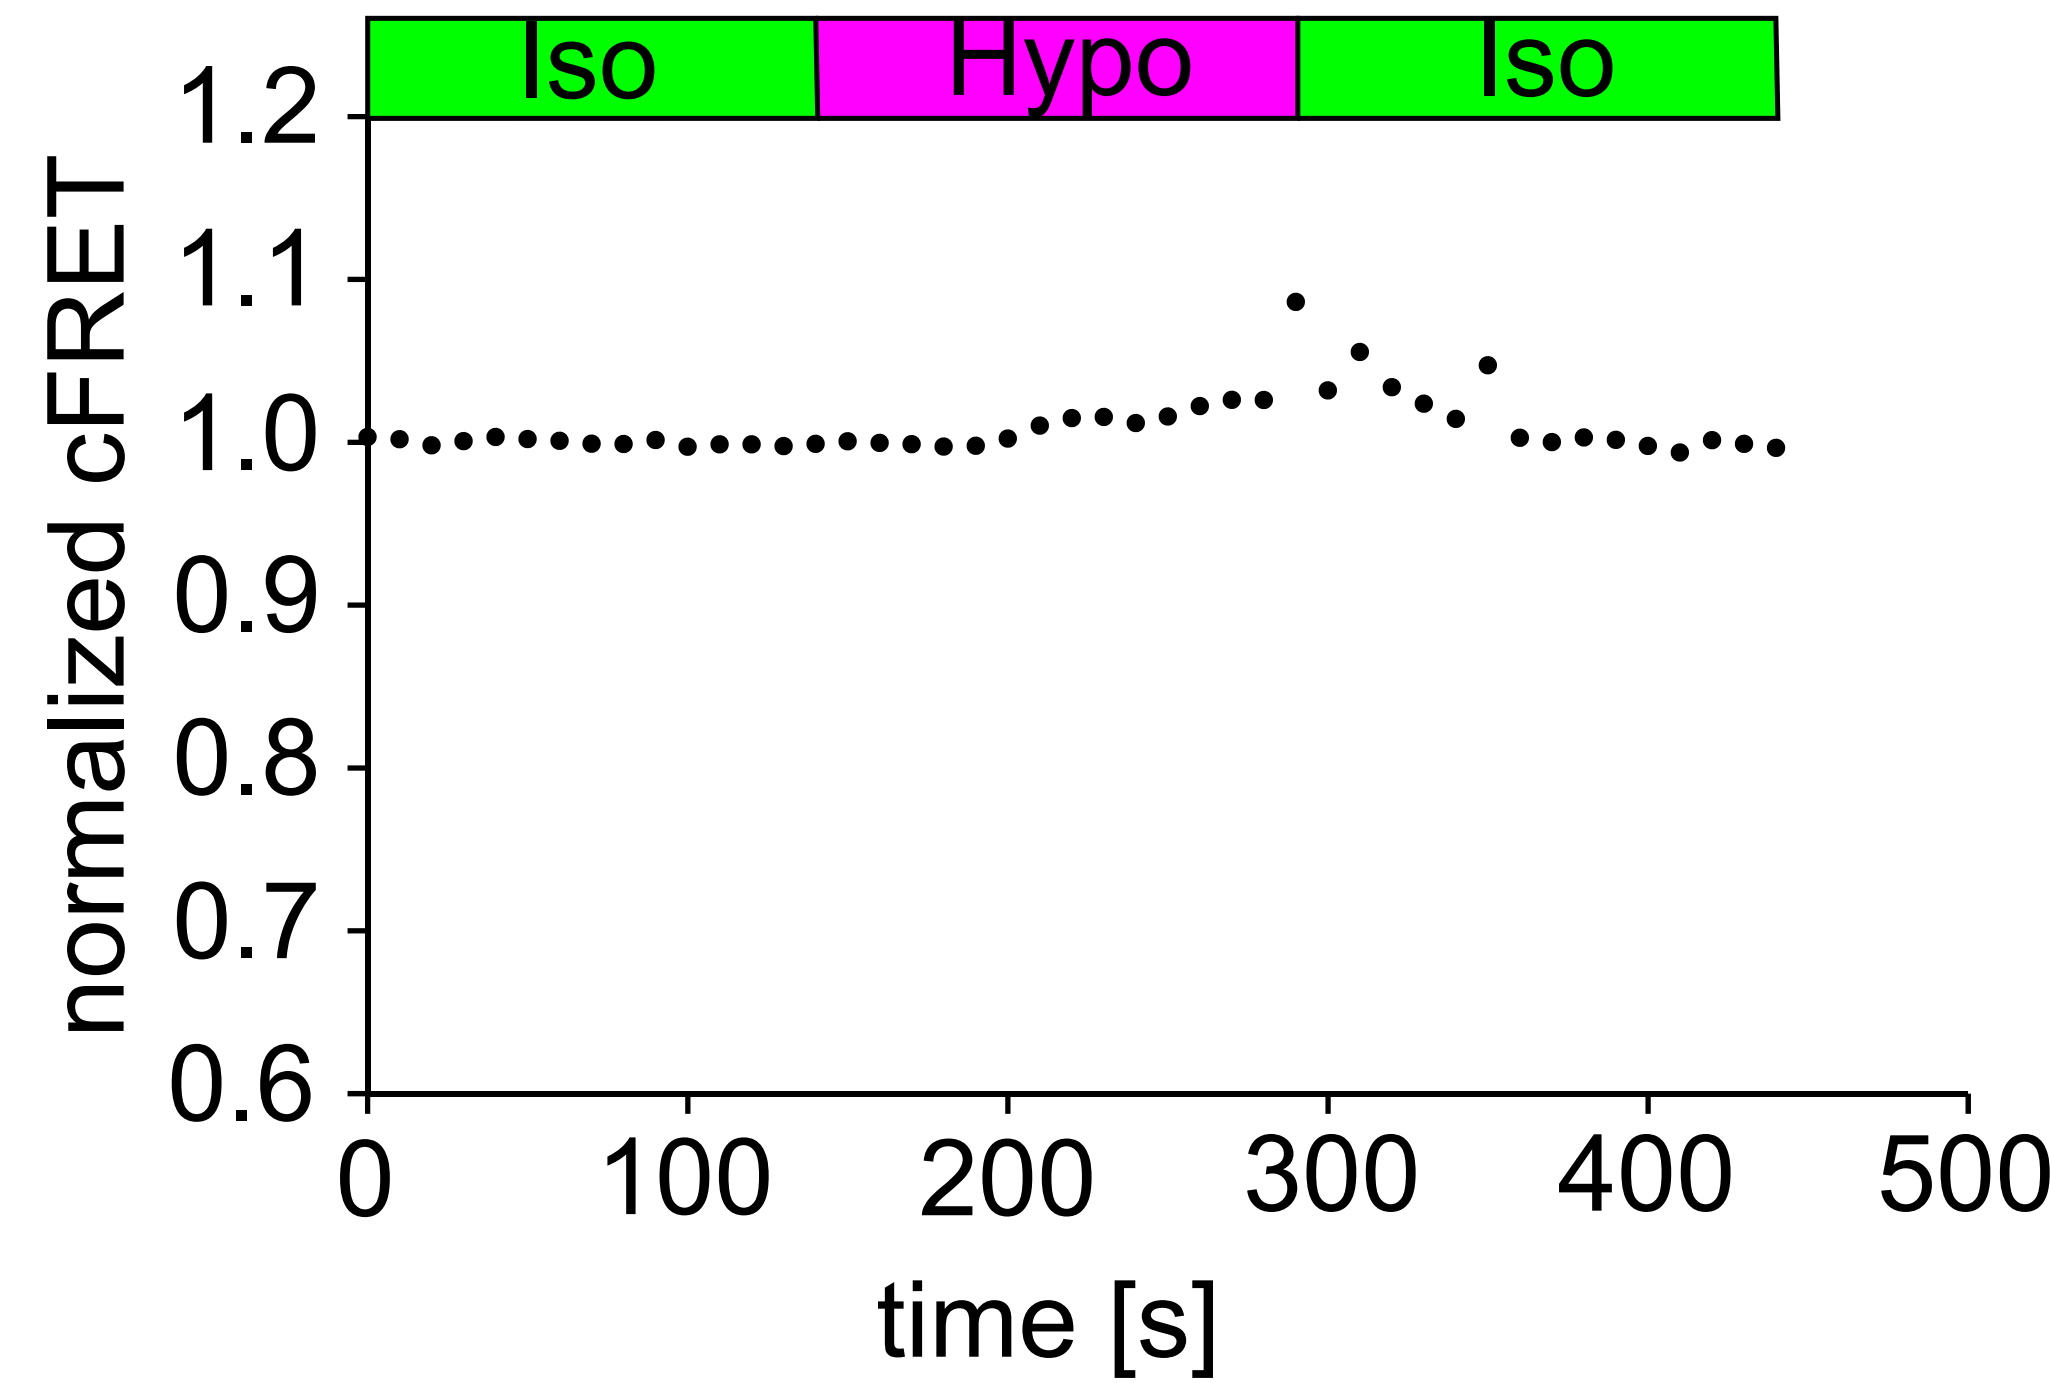

Supplement: supp [file elife-45421-supp-v1.zip › elife_poa_e45421_Figure_1_figure_supplement_1.pdf]

**A**

## Actin depolymerization

untreated

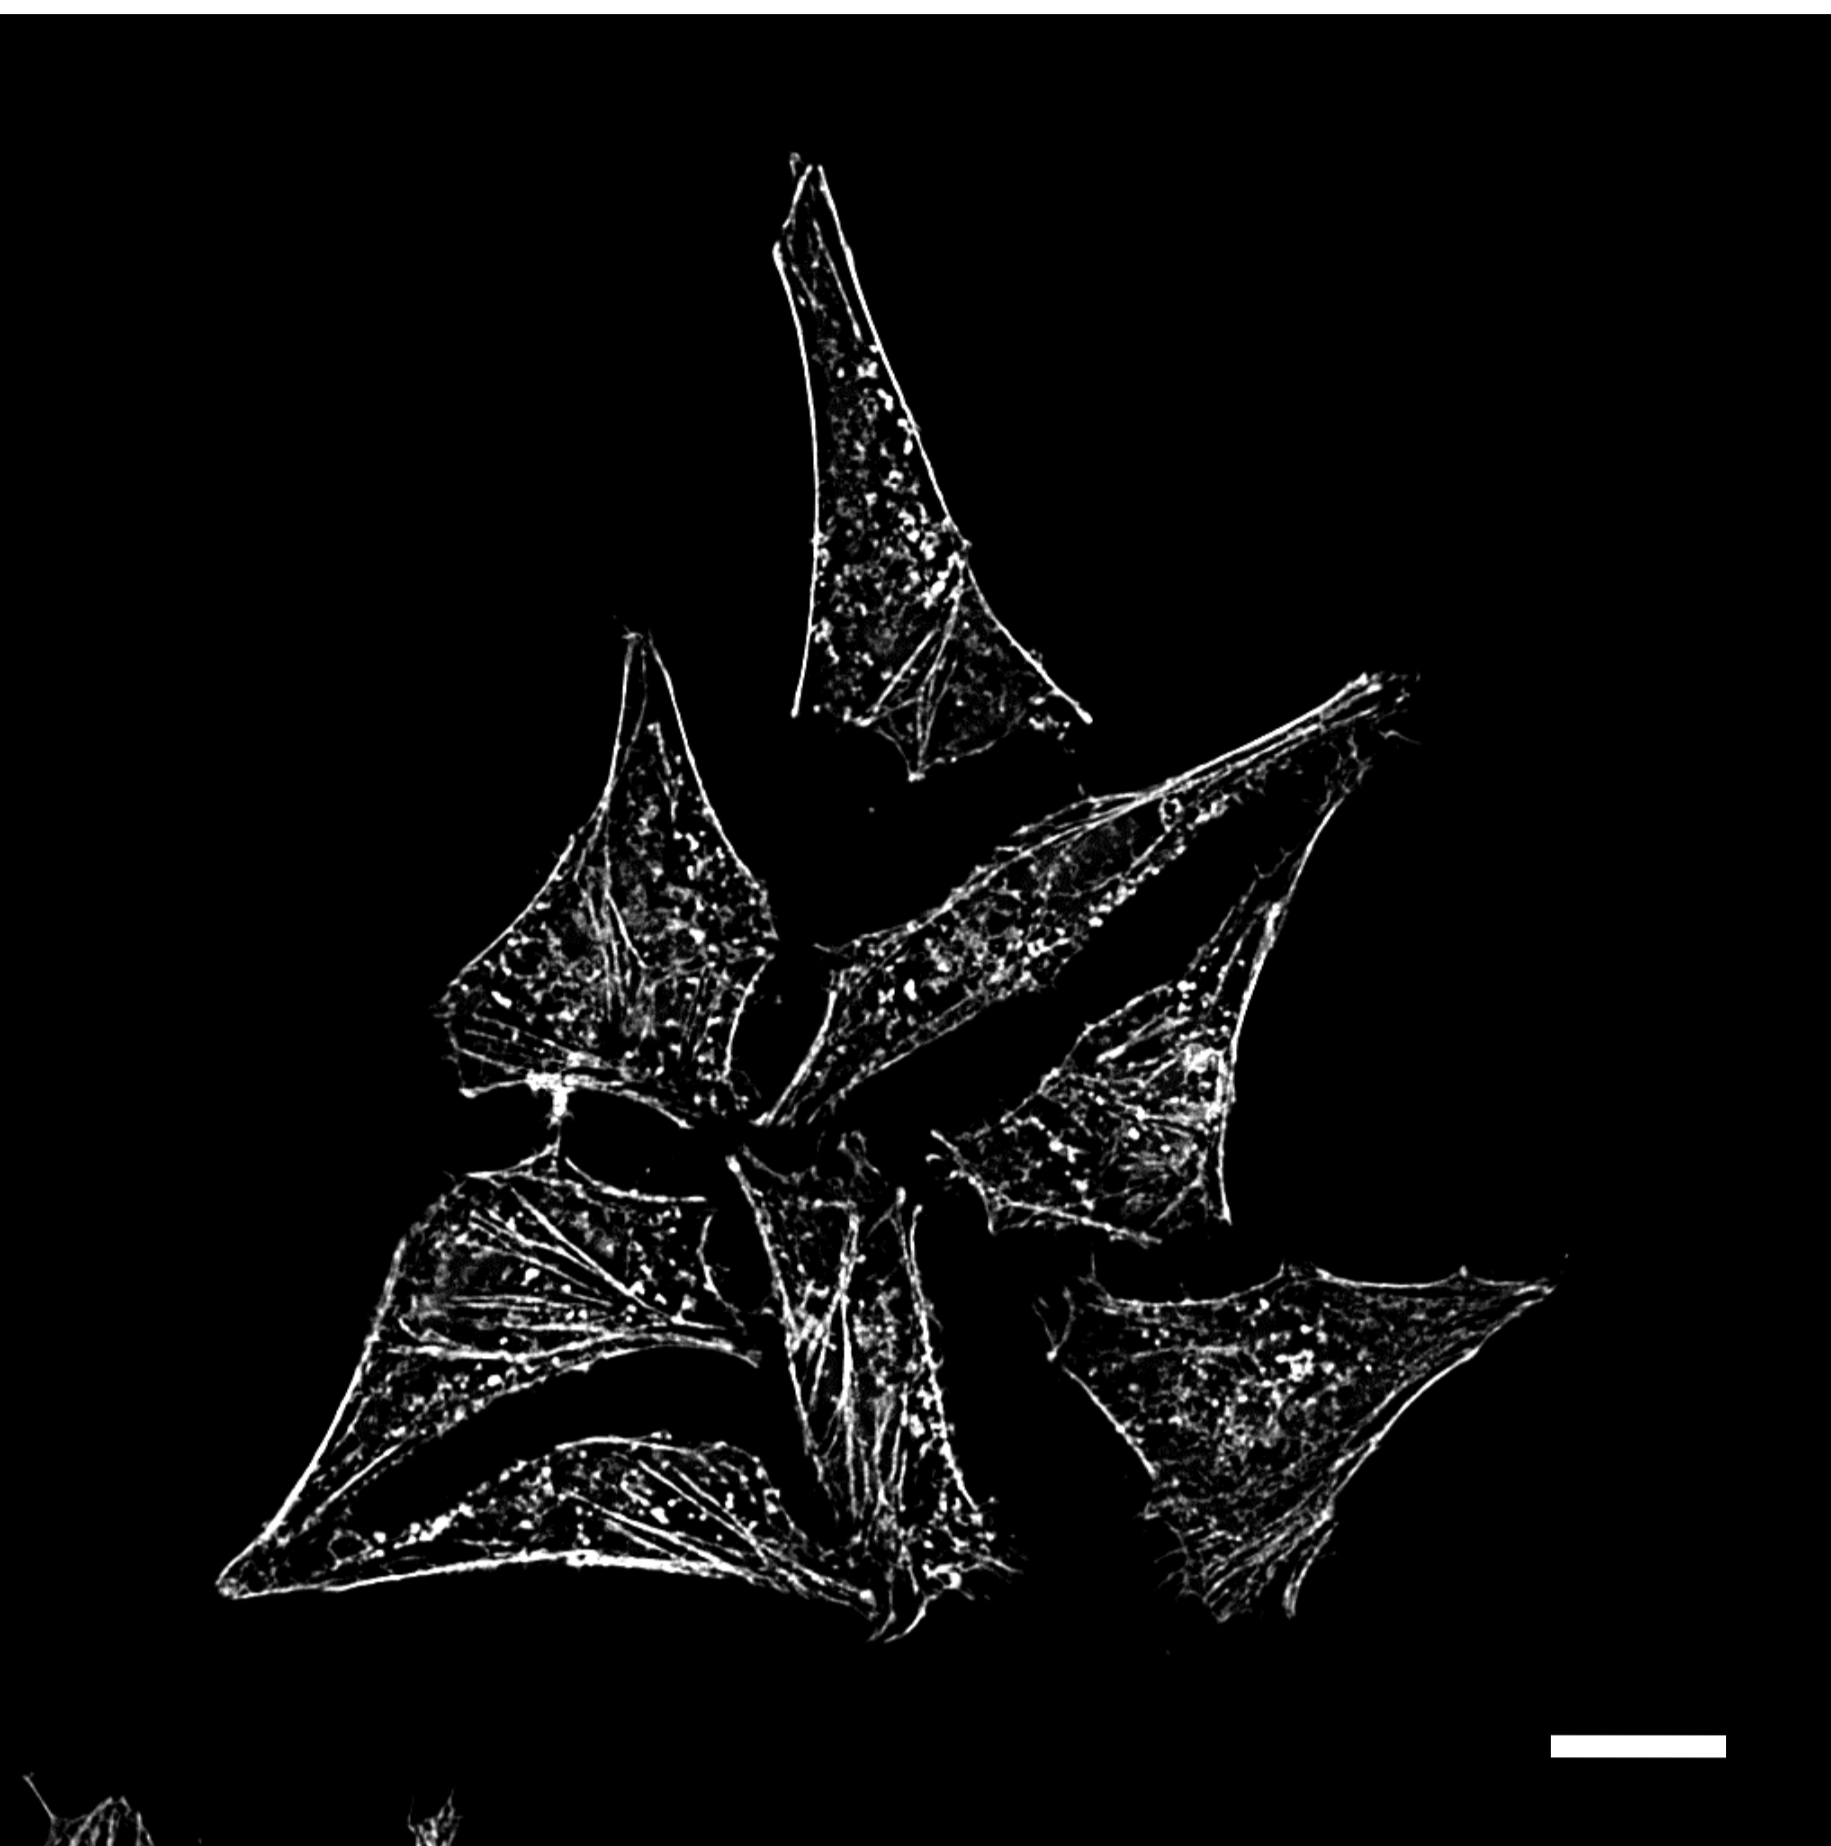

LatB

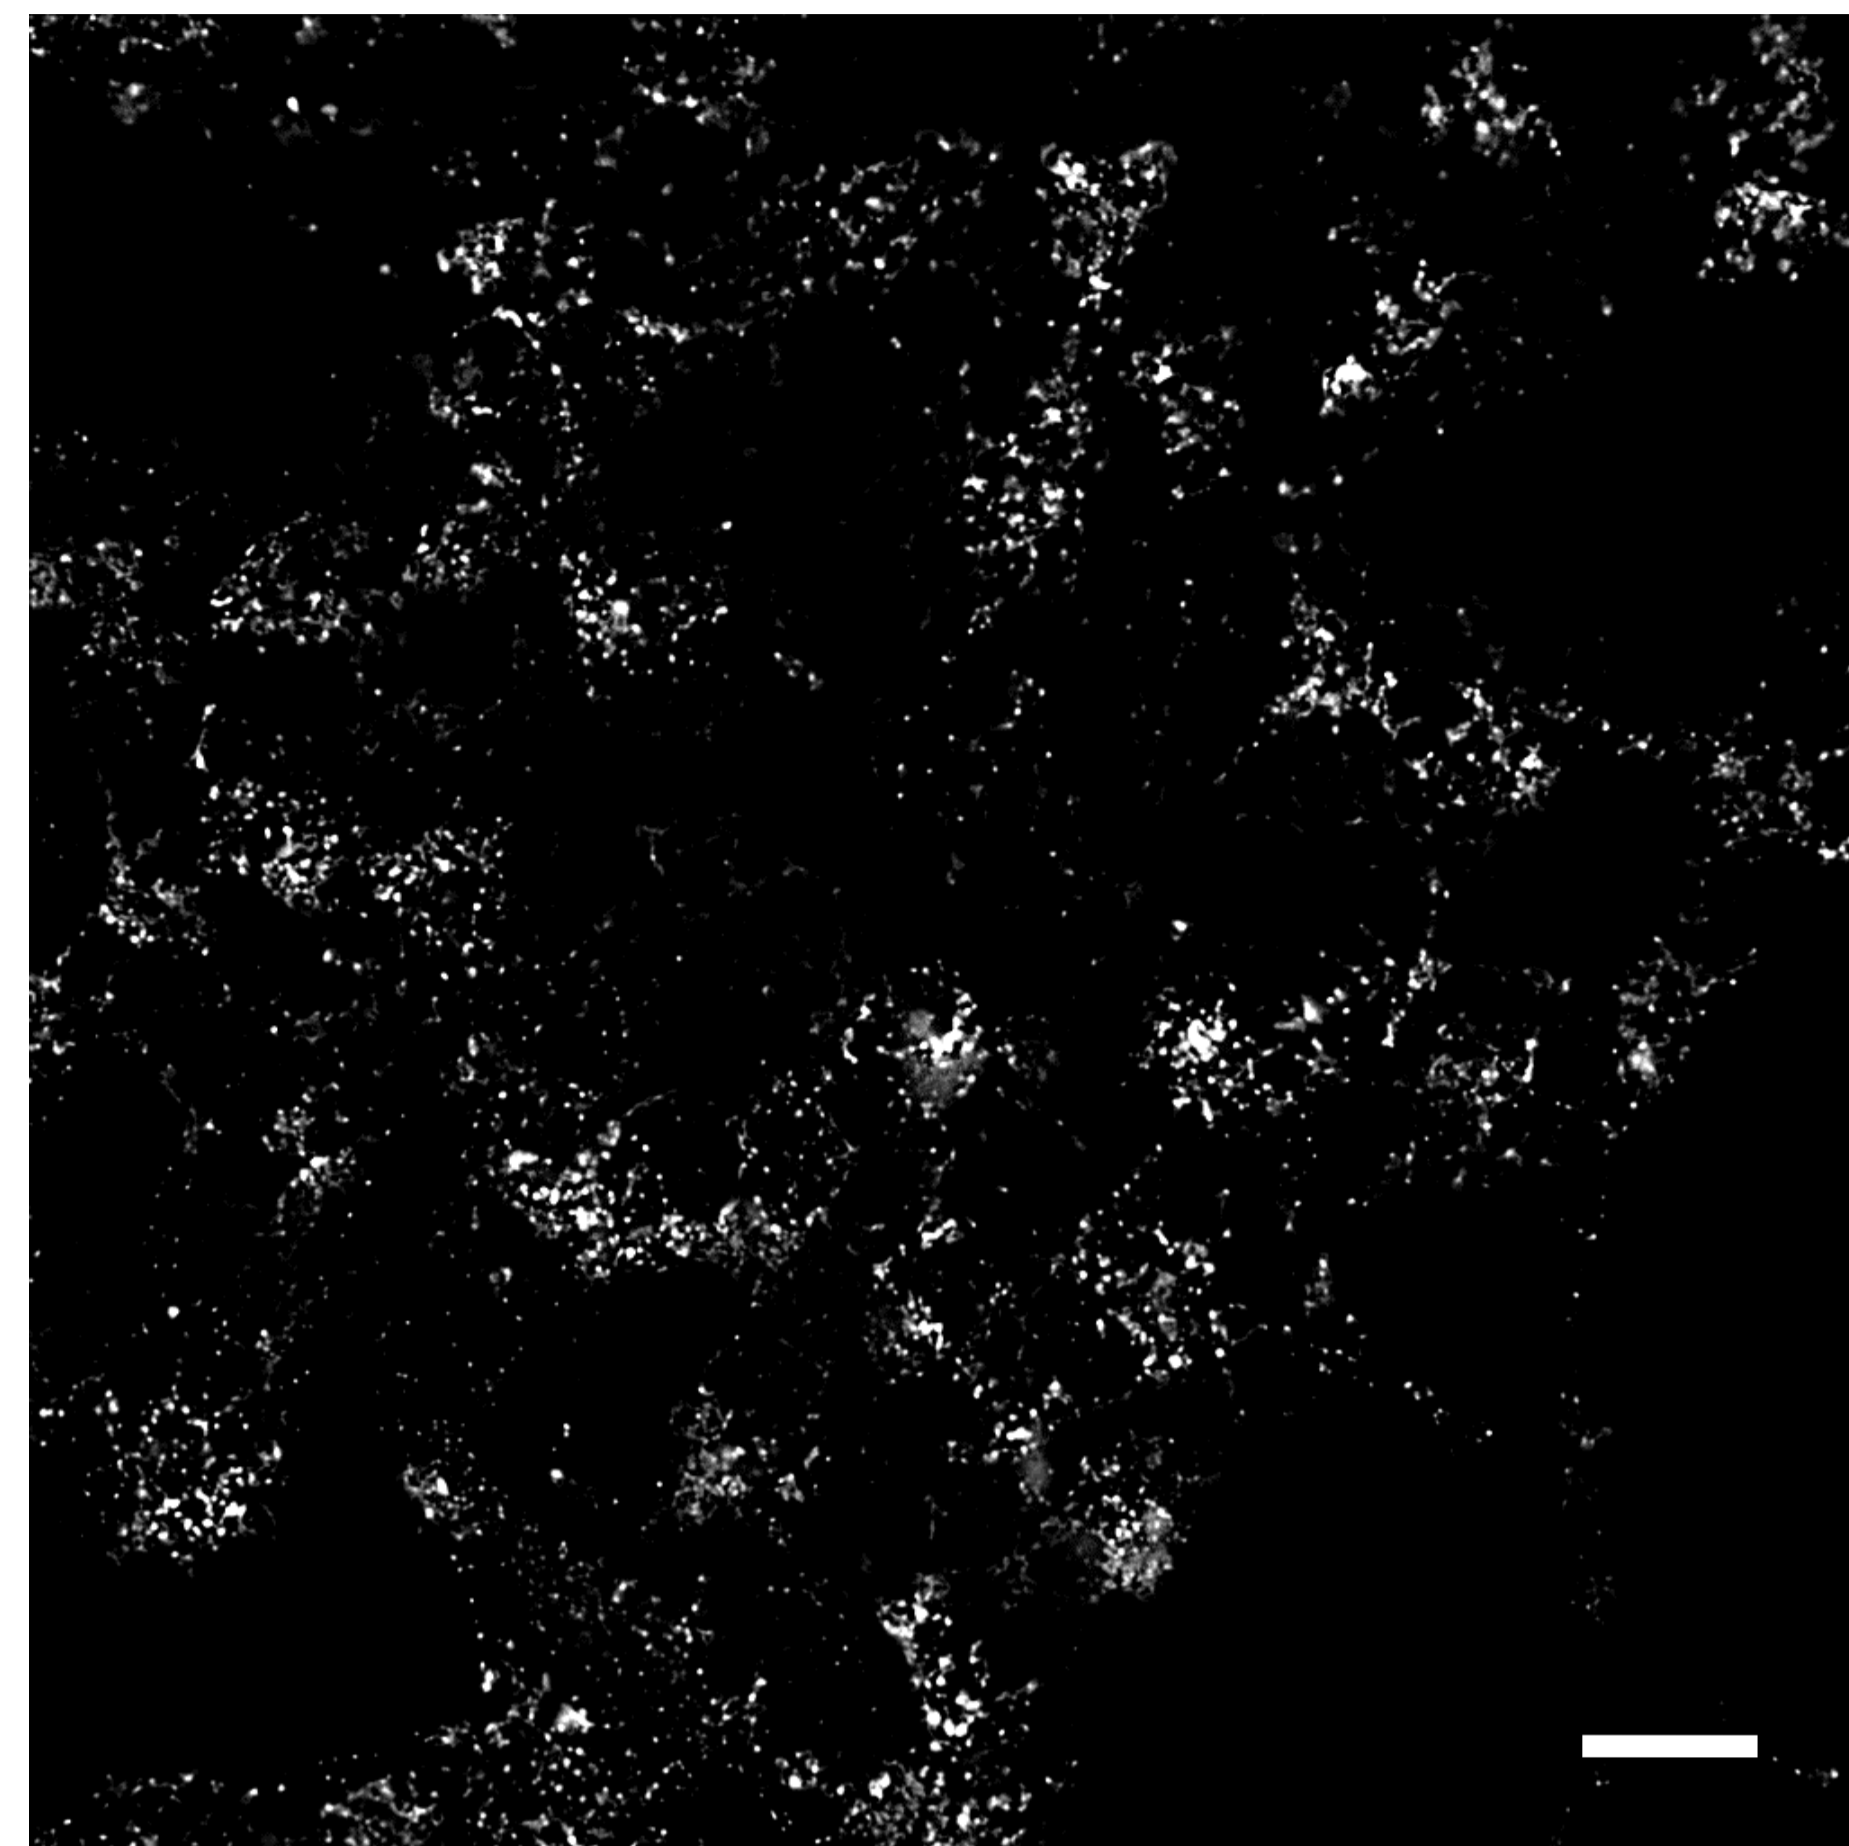**C**

## Cholesterol depletion

untreated

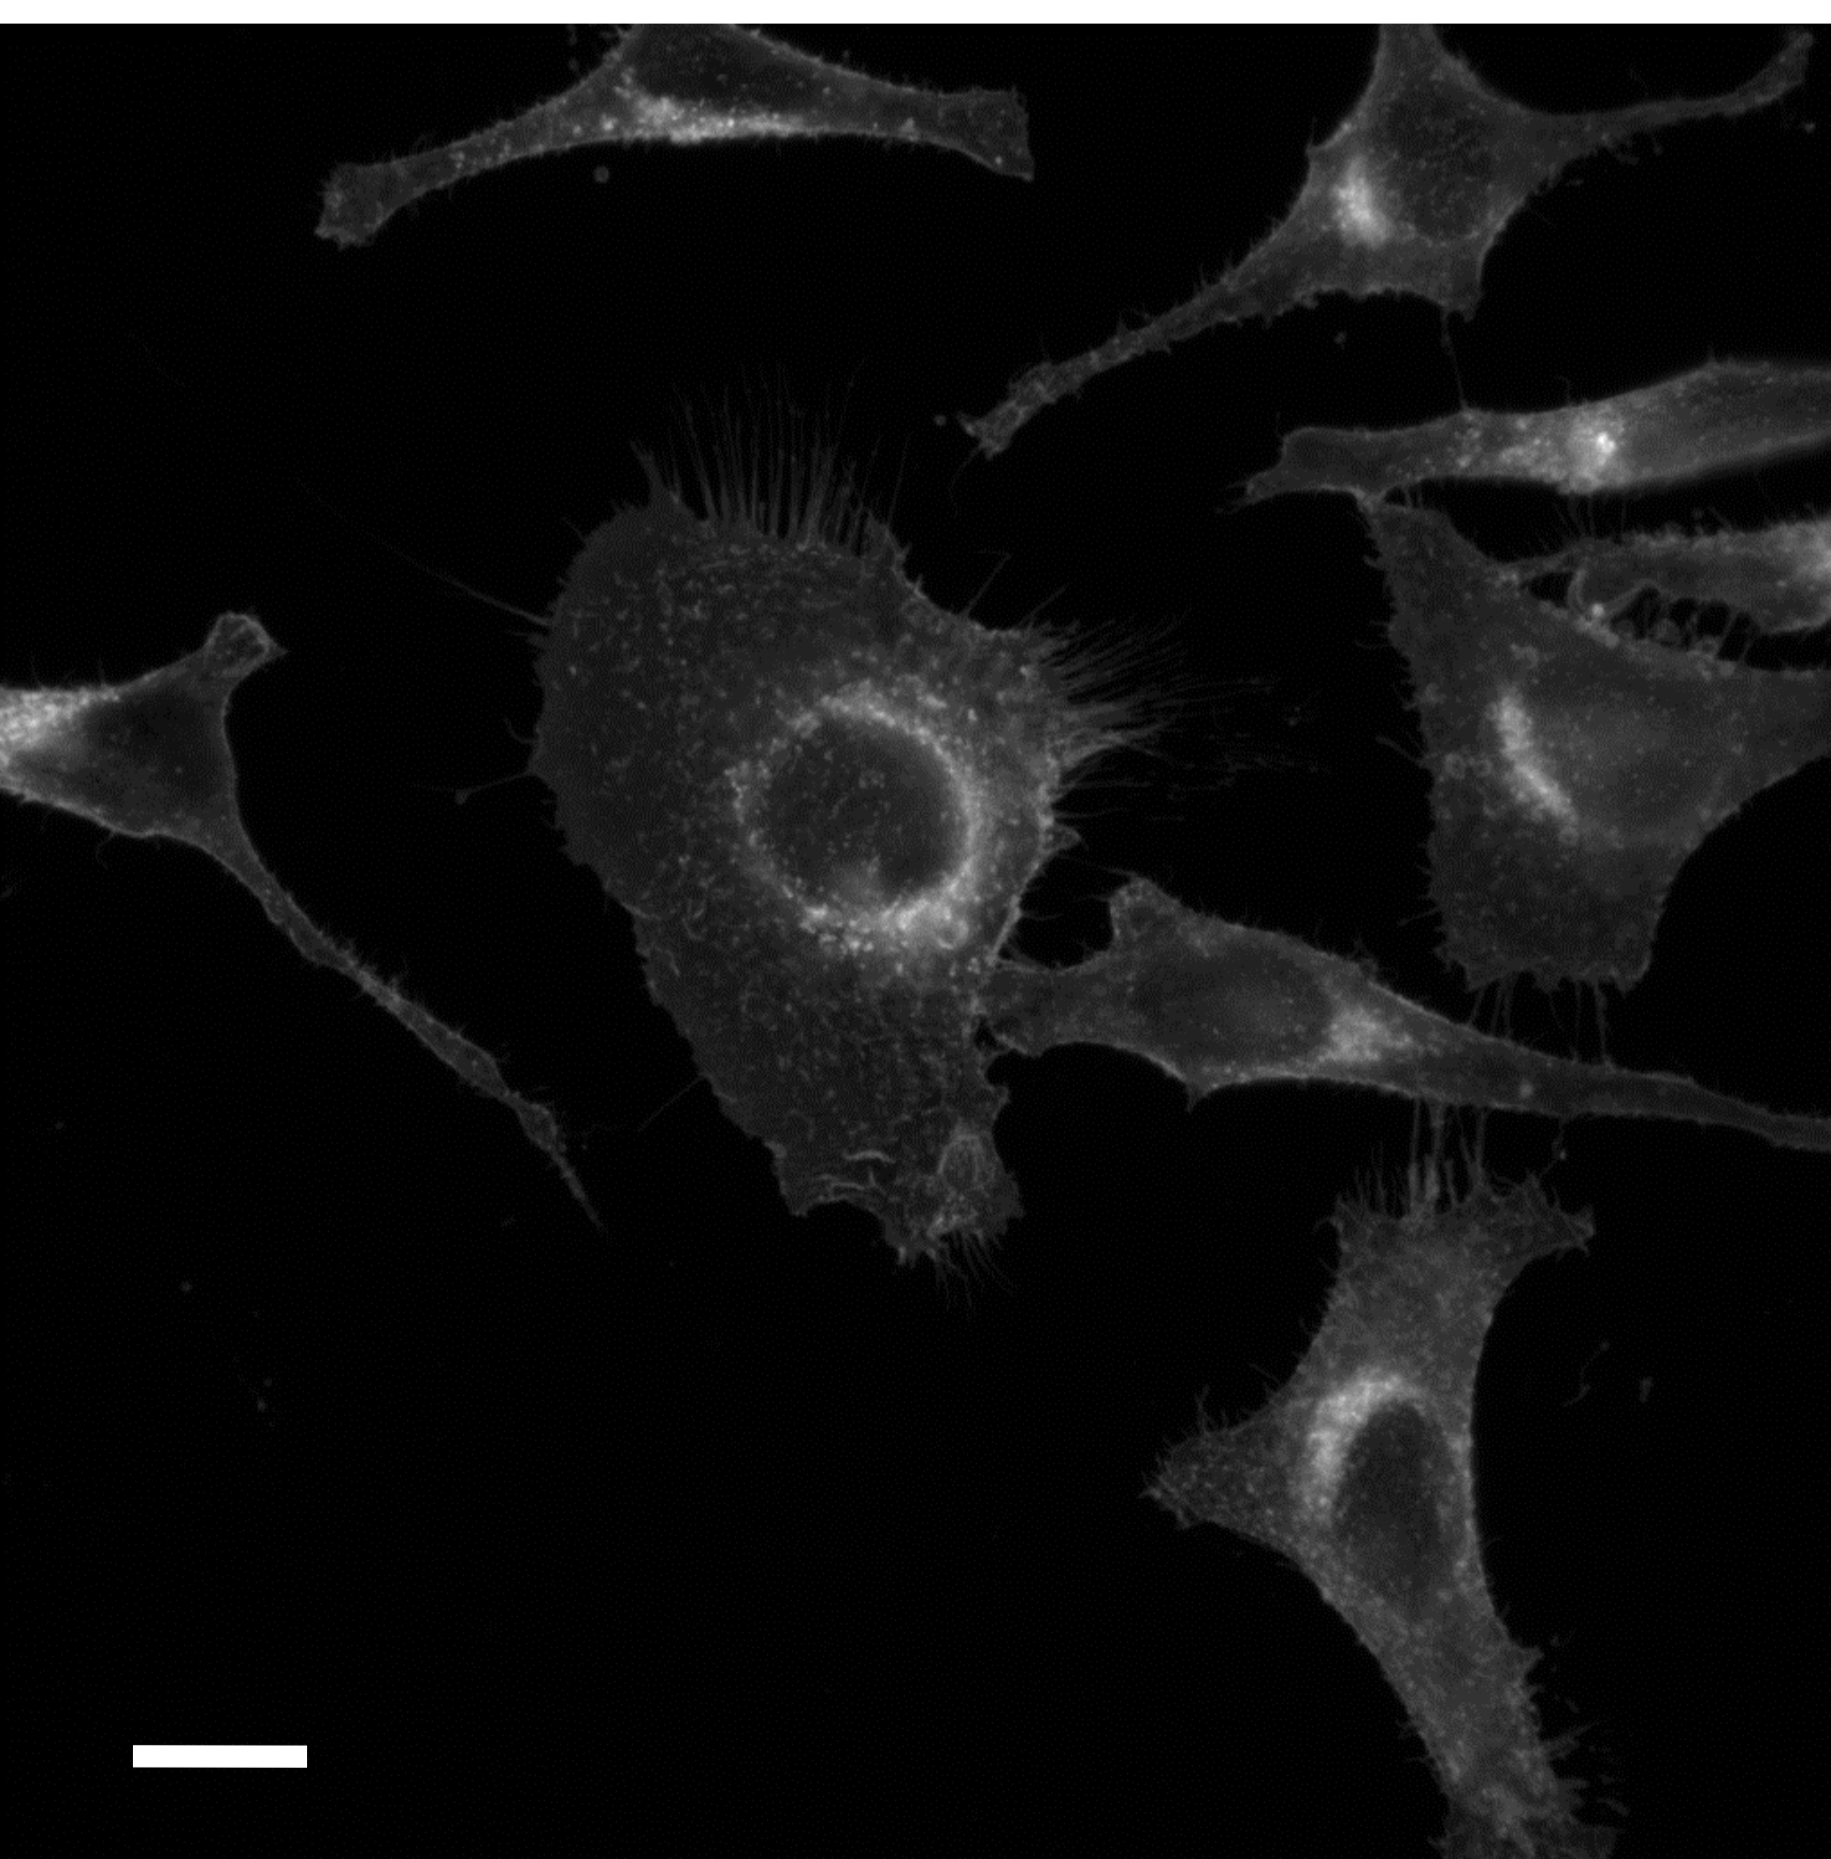

MbCD

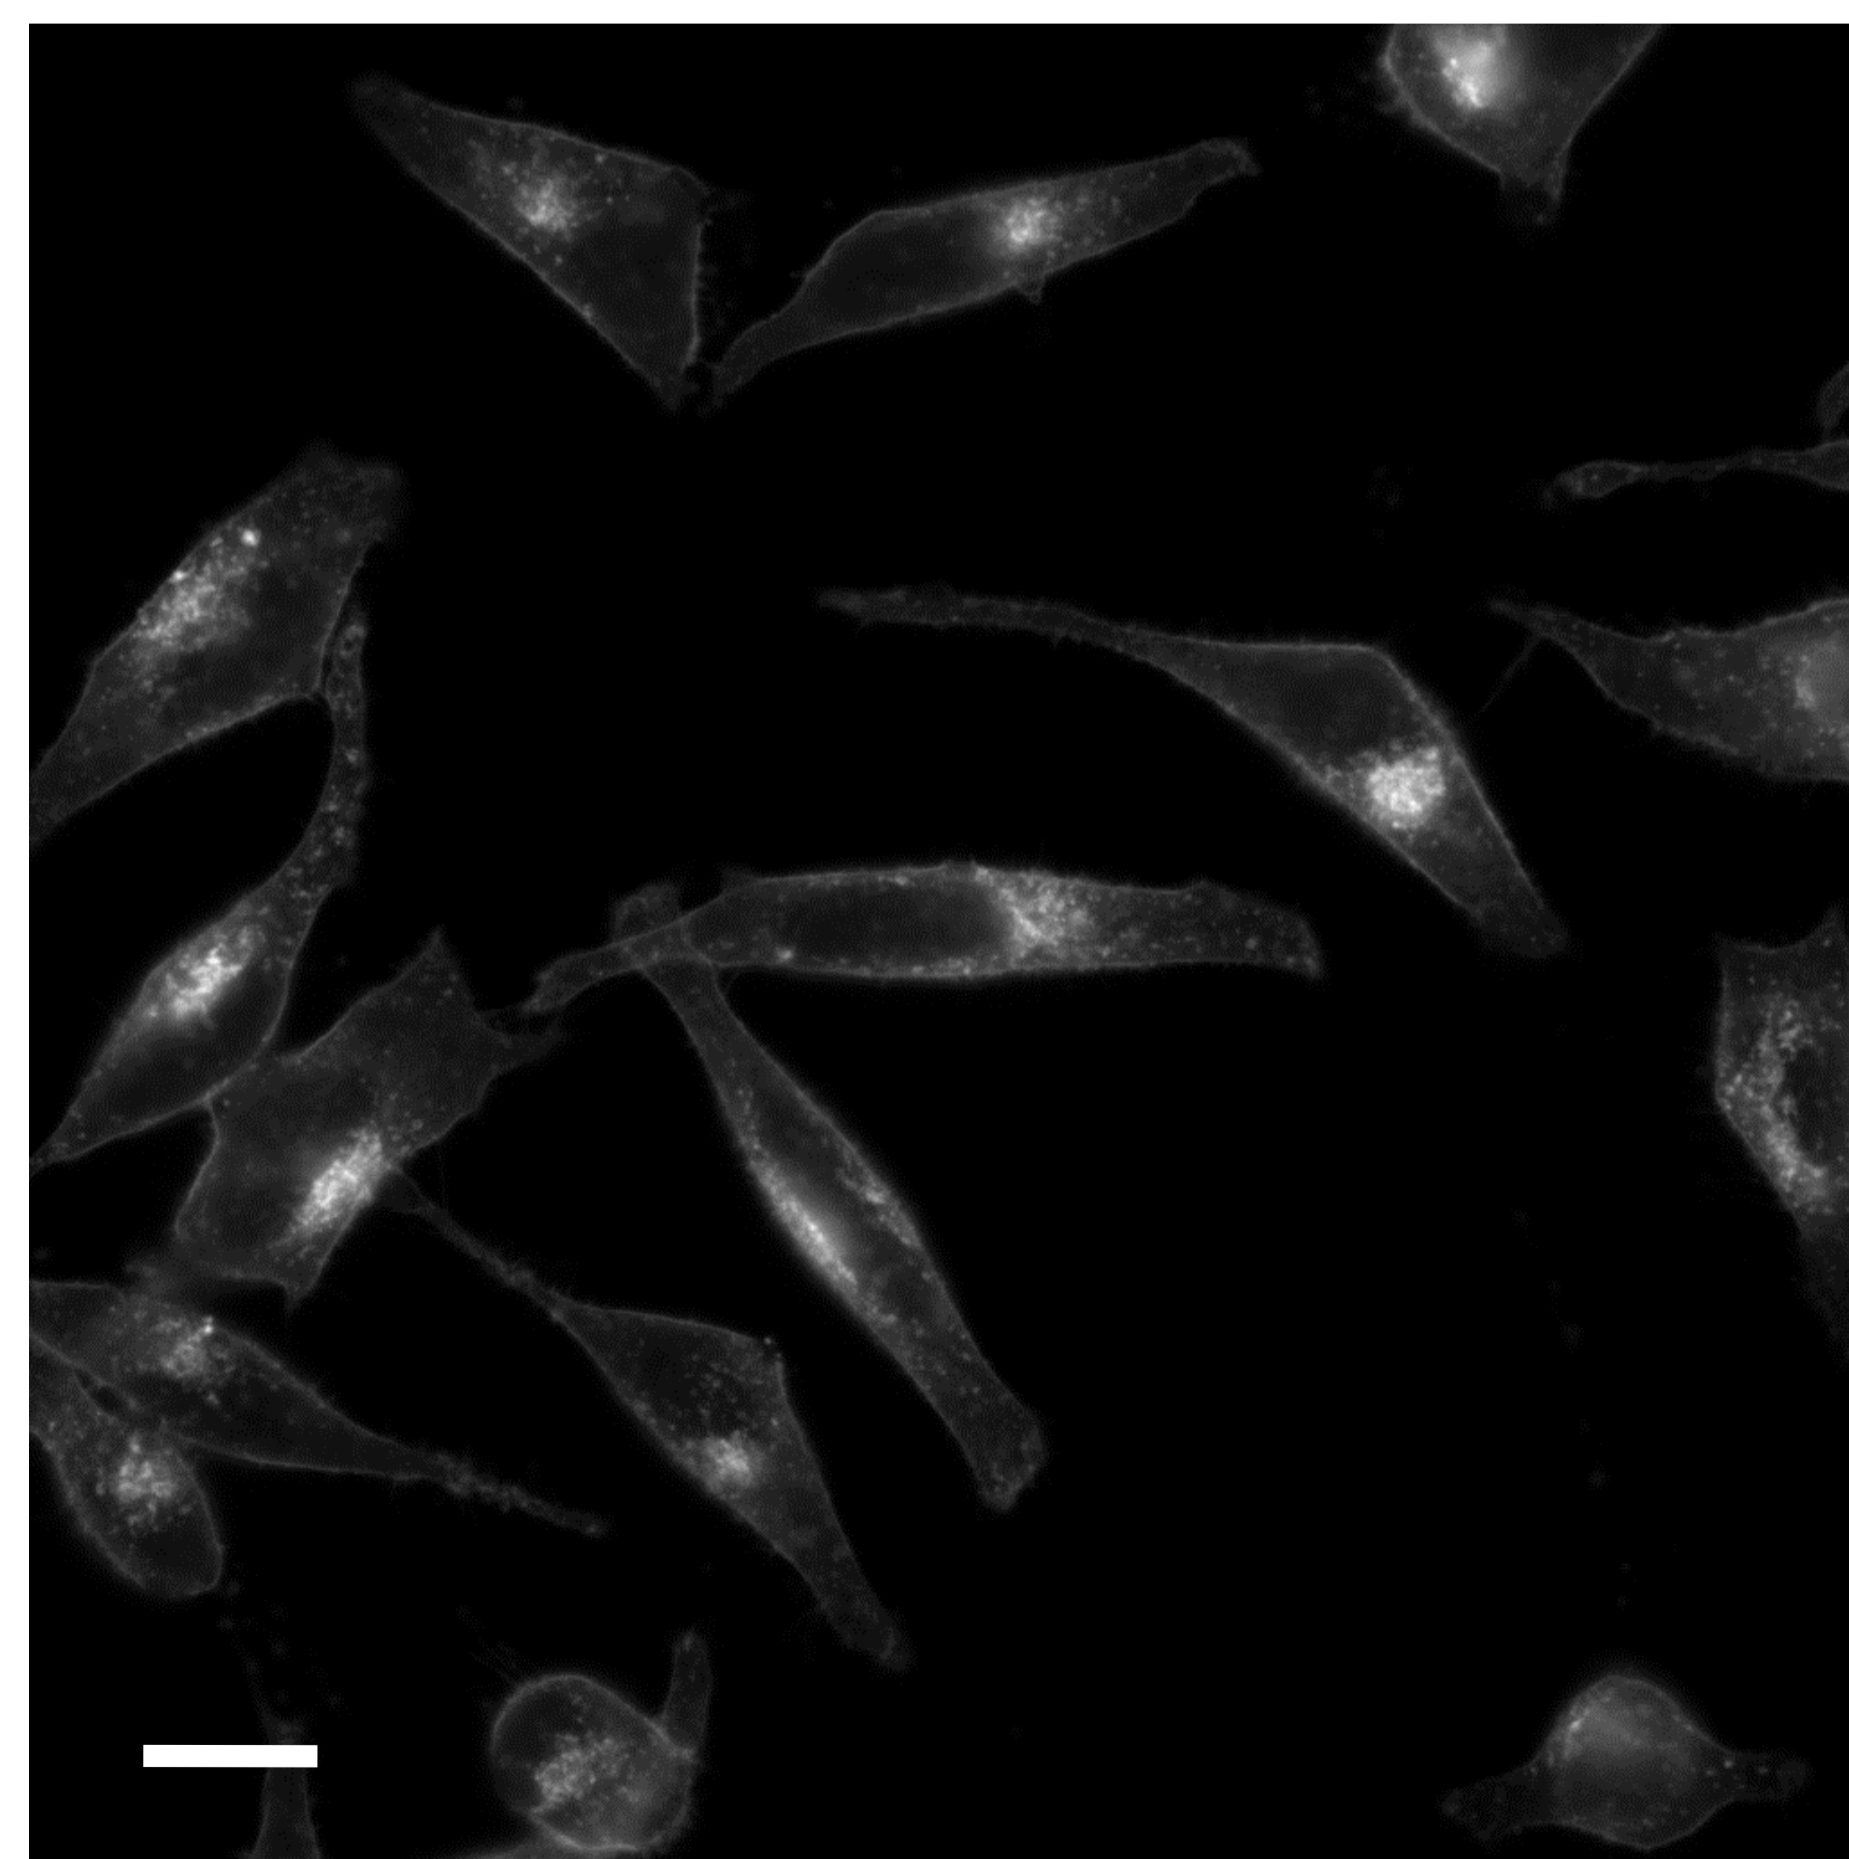**B**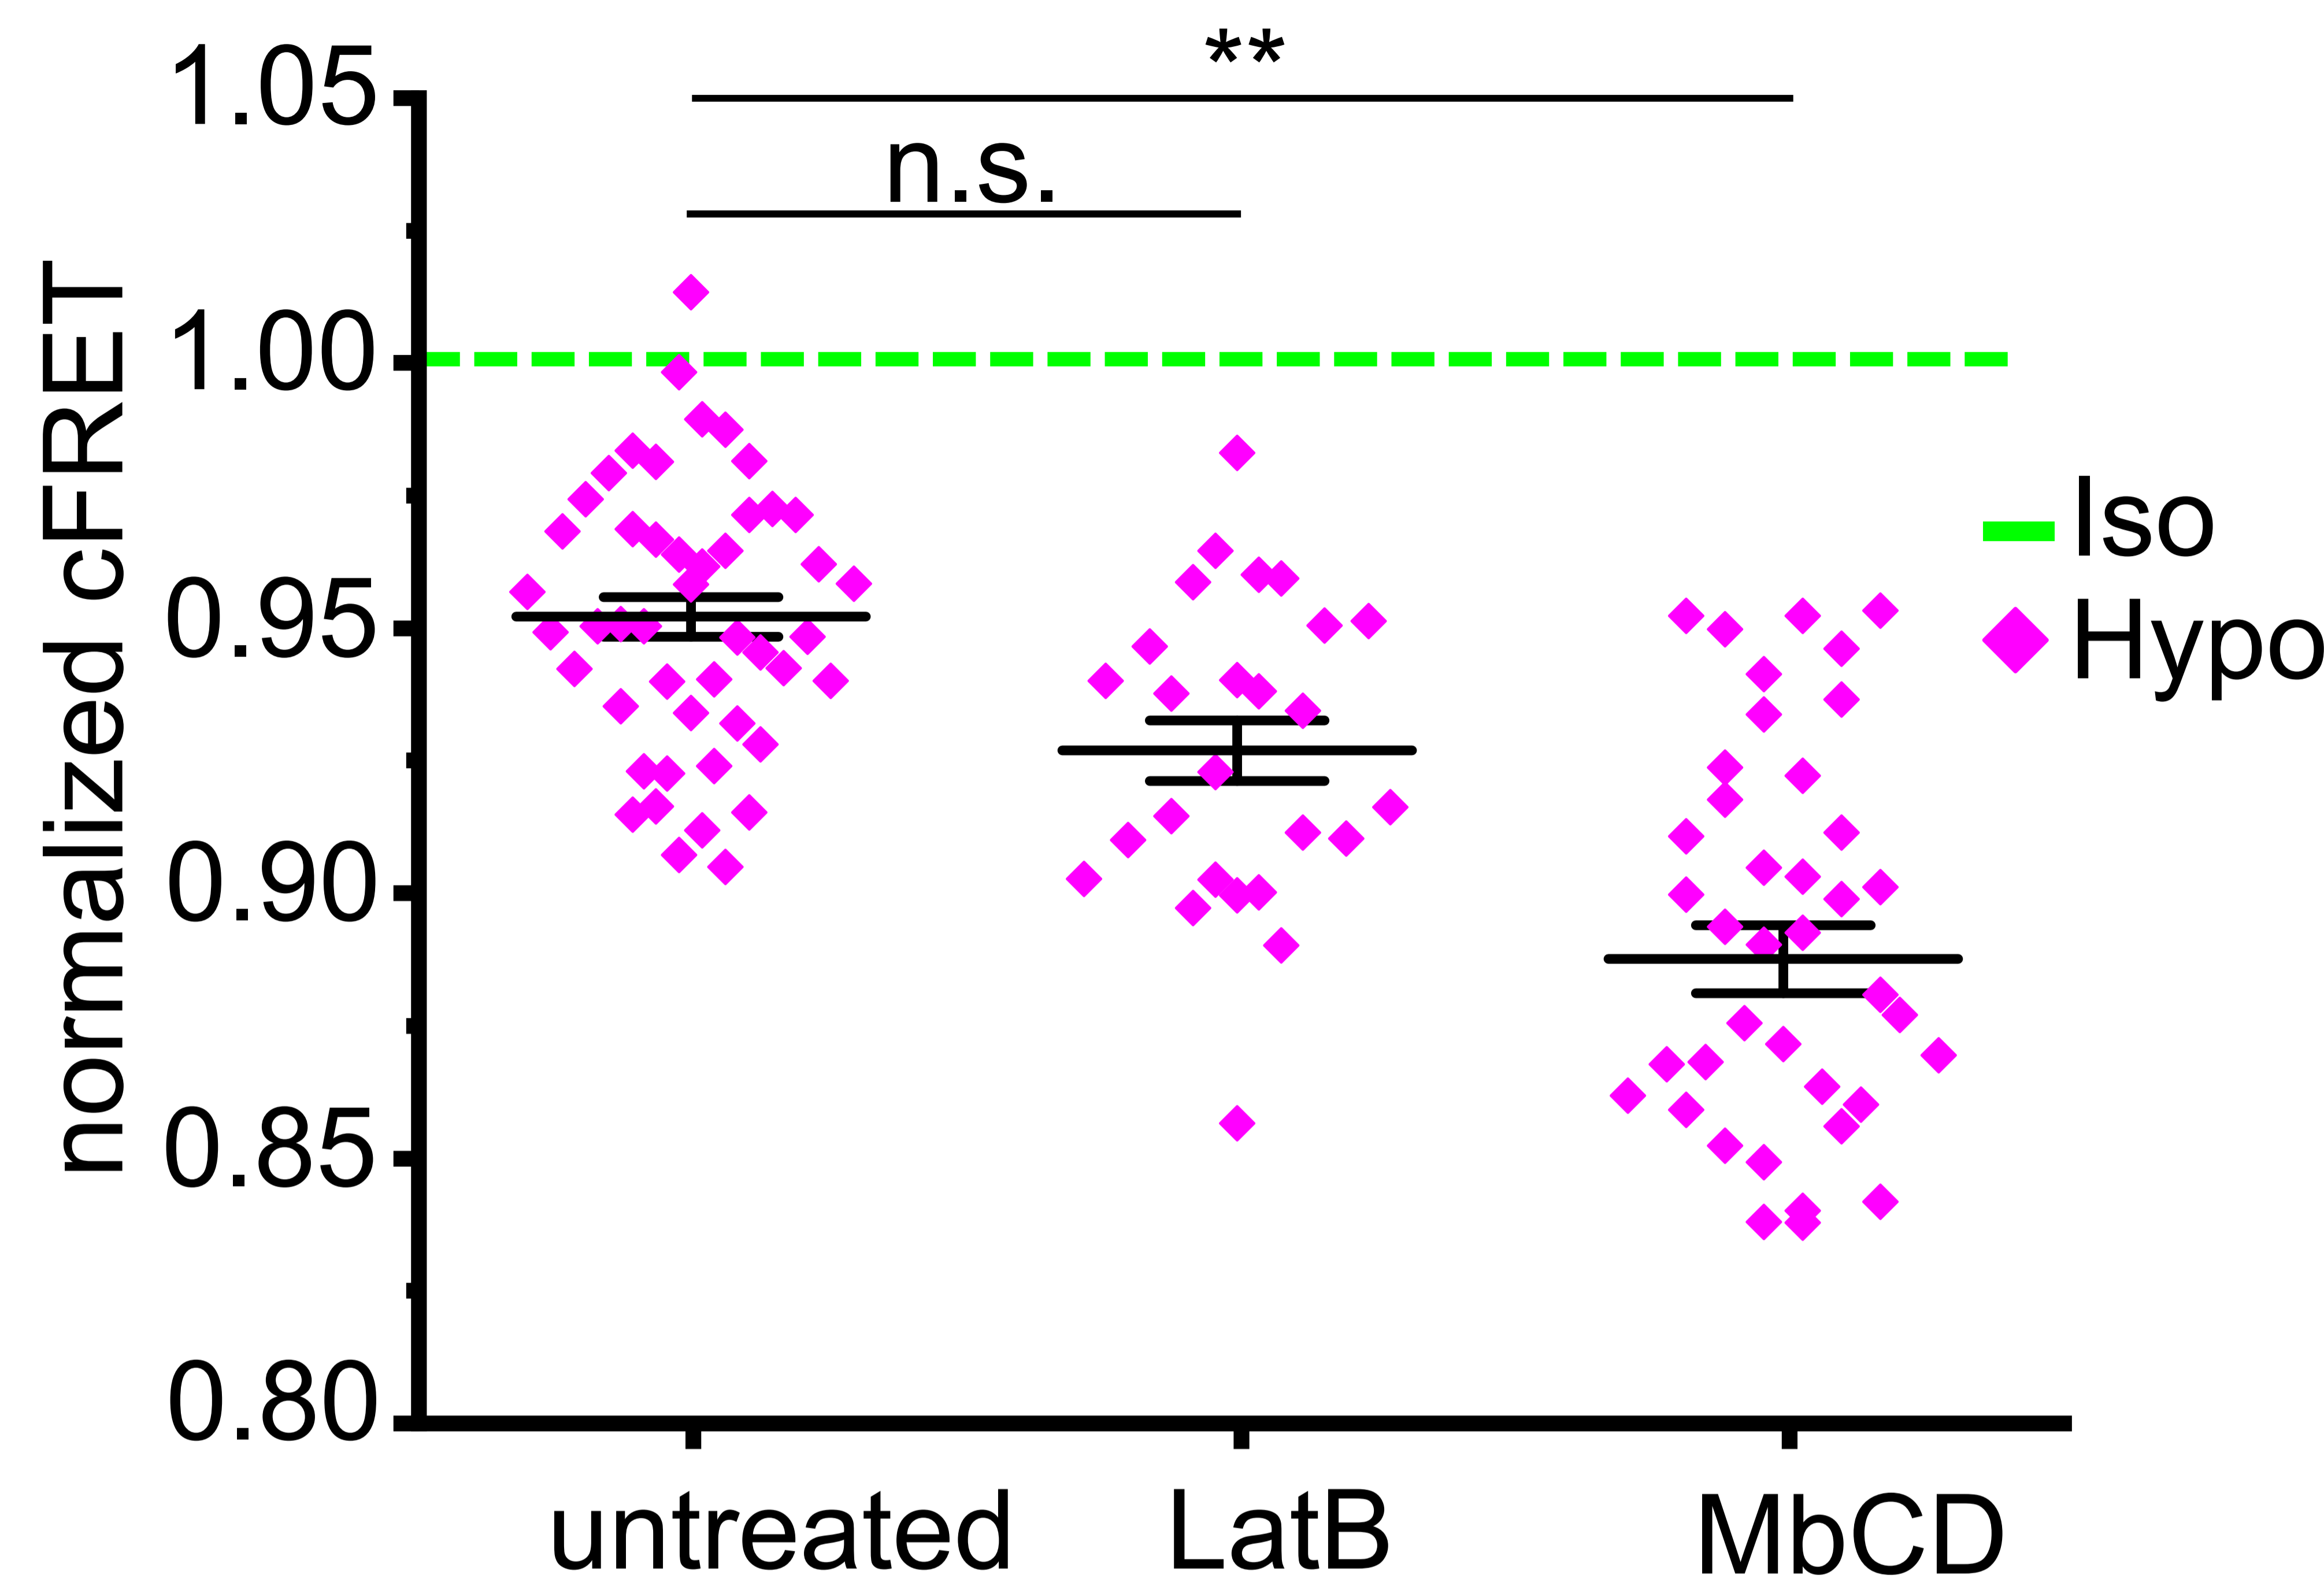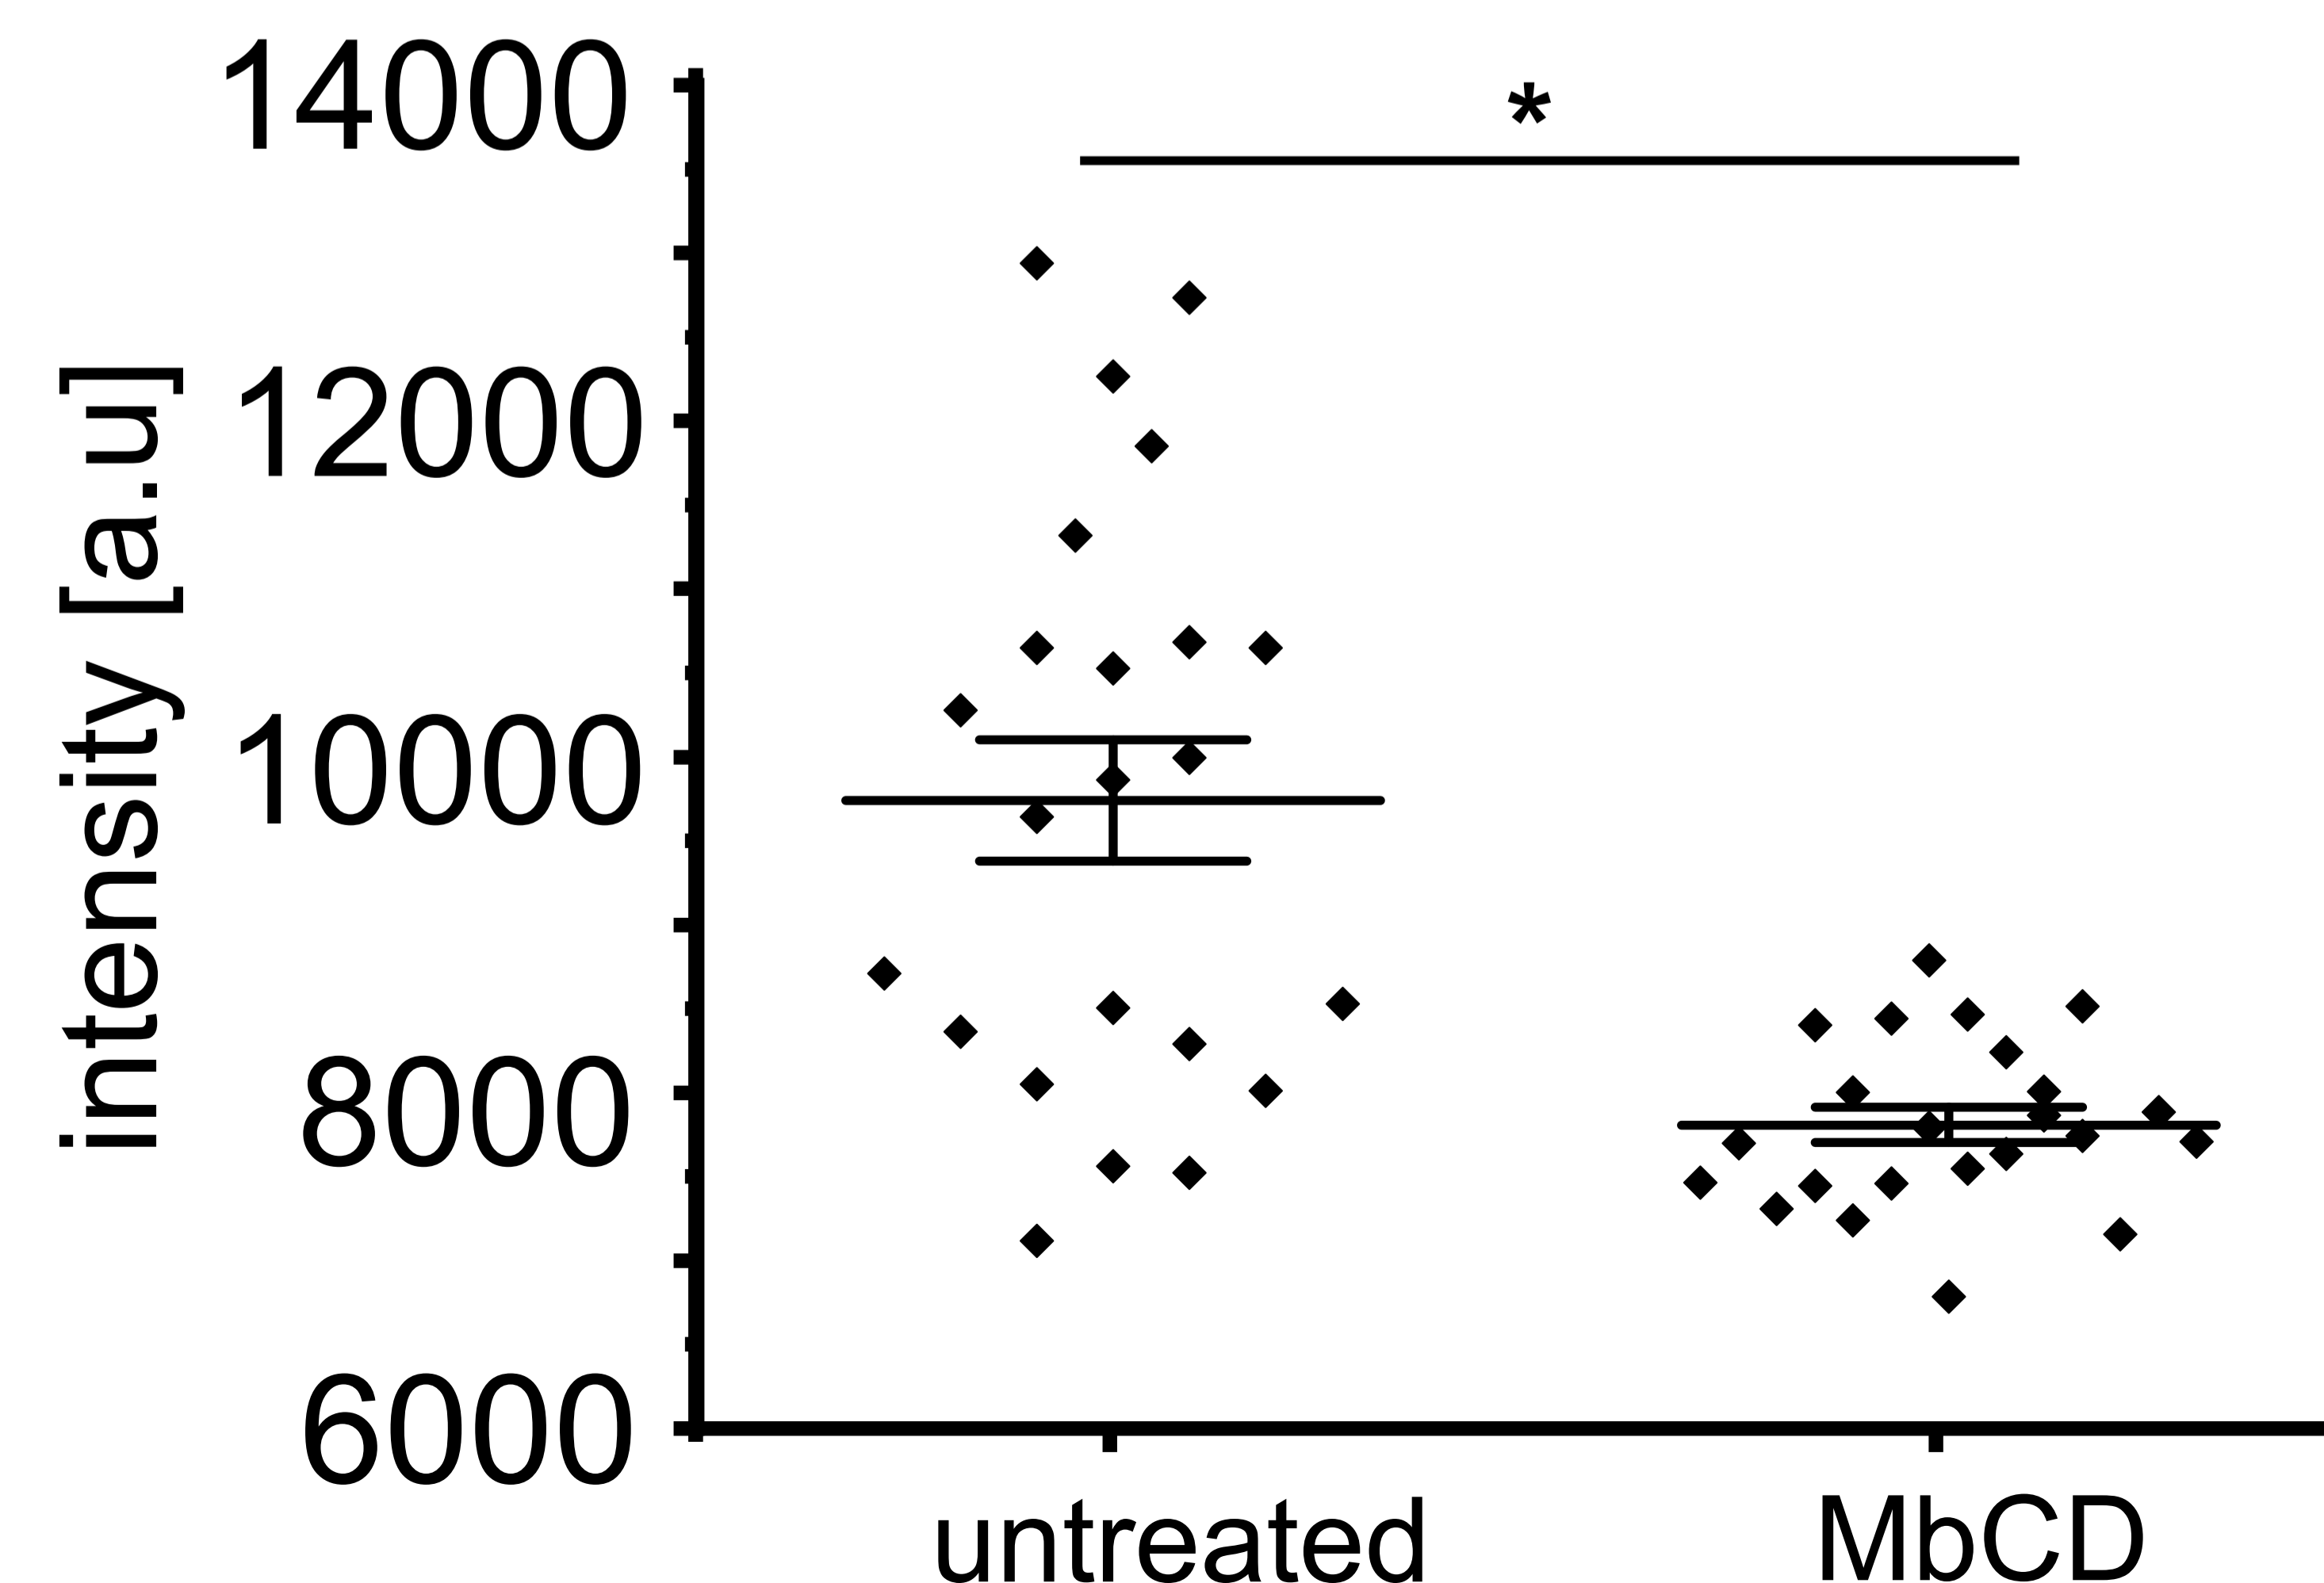

Supplement: supp [file elife-45421-supp-v1.zip › elife_poa_e45421_Figure_3_figure_supplement_2.pdf]

A-CFP FM<sub>2</sub>

organelle  
marker

merge

10 min  
ER-YFP

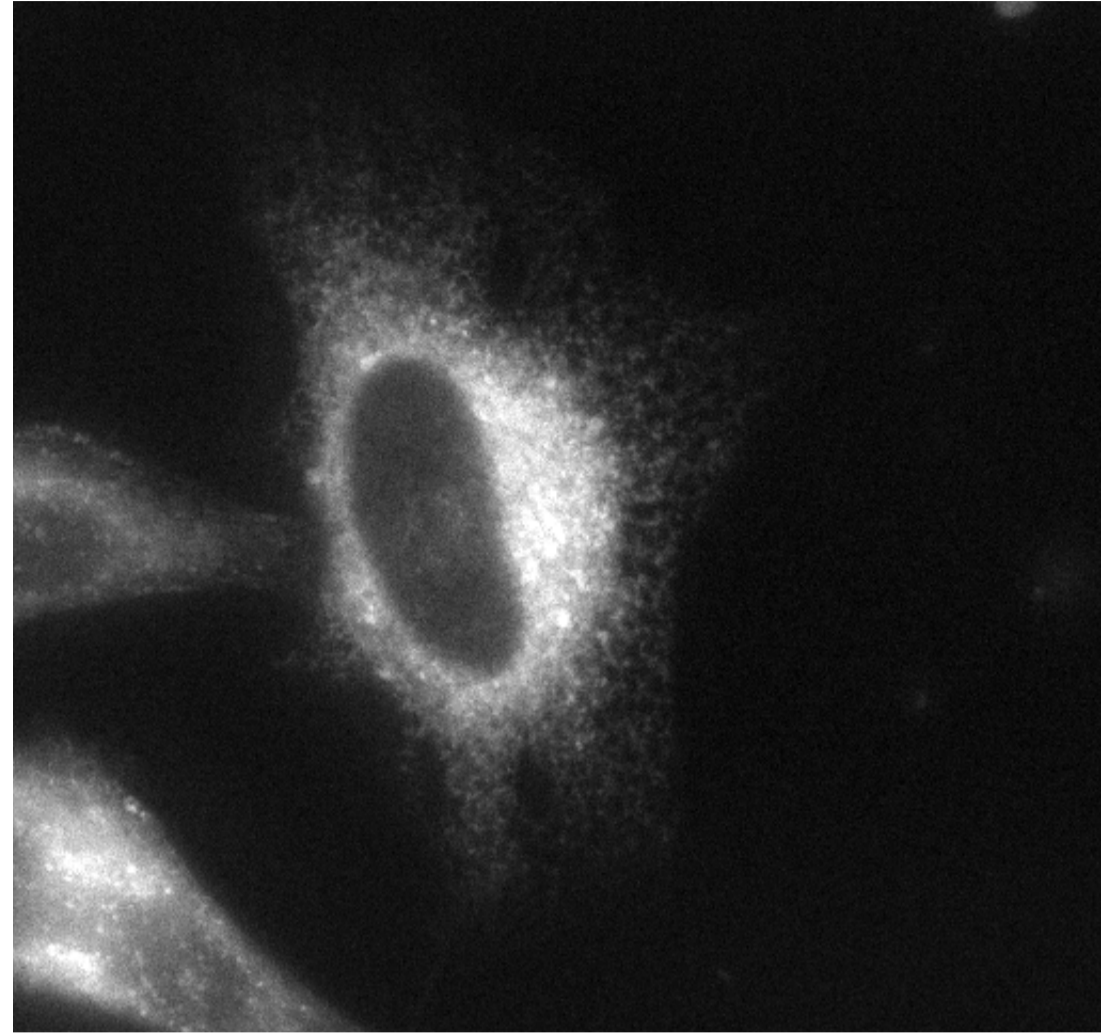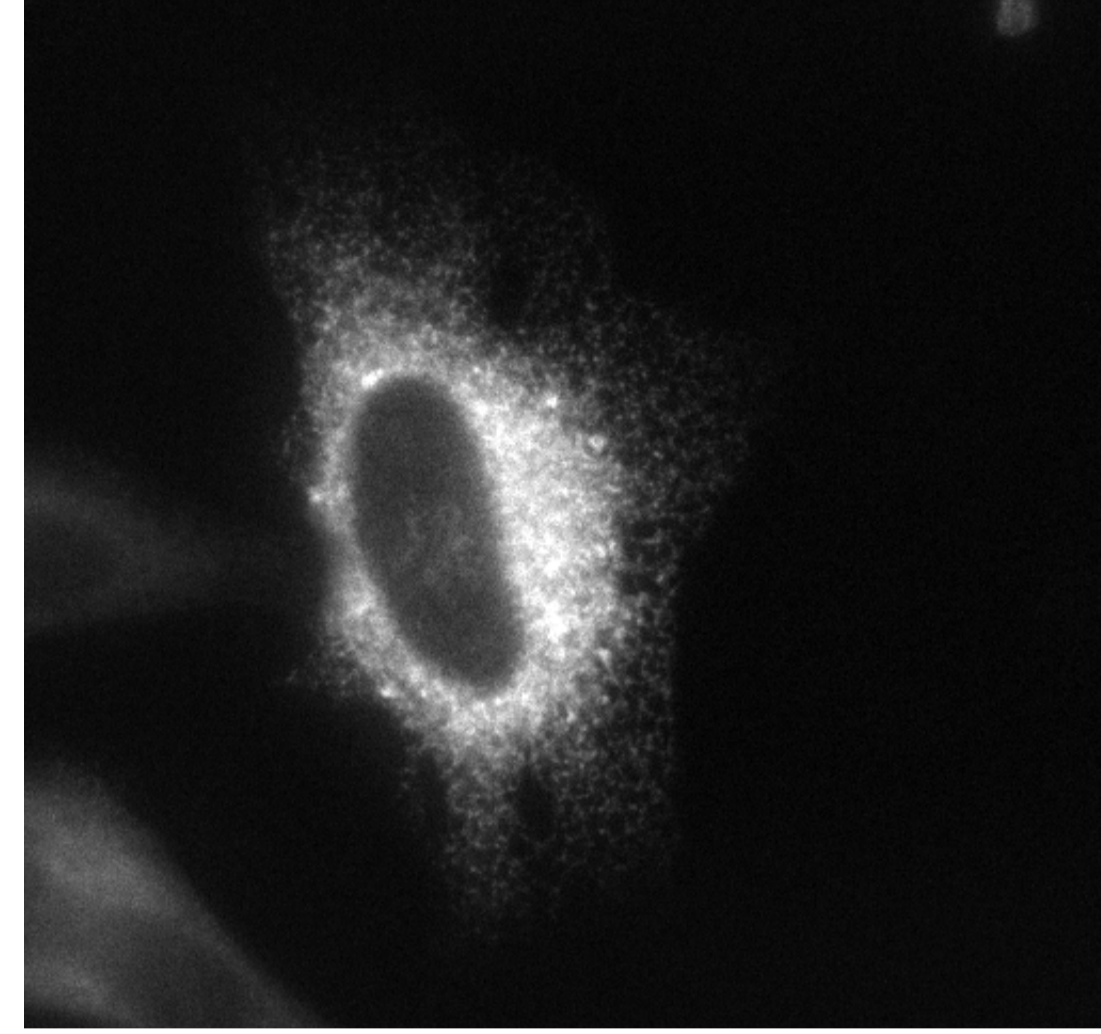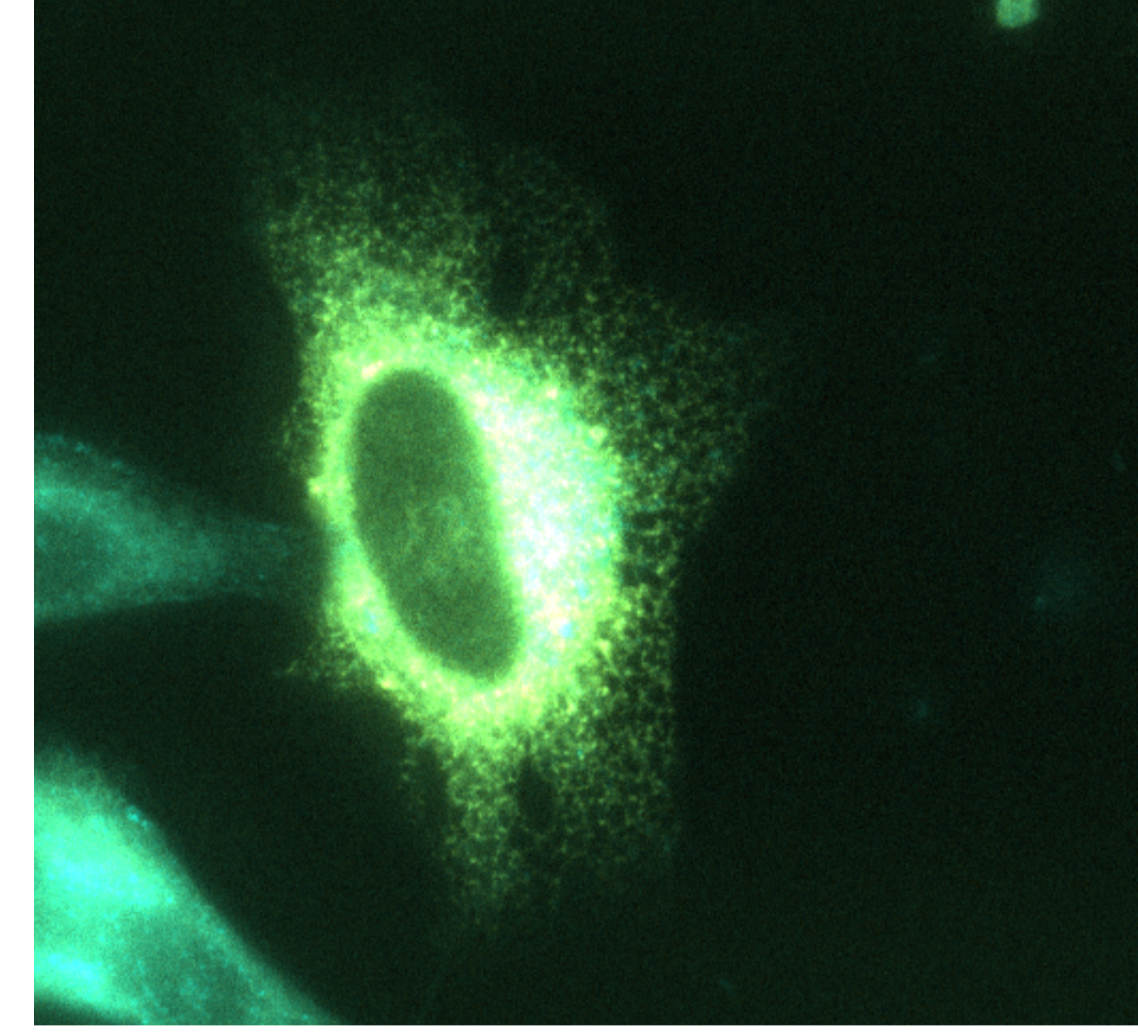

80 min  
GalNAc-T2-RFP

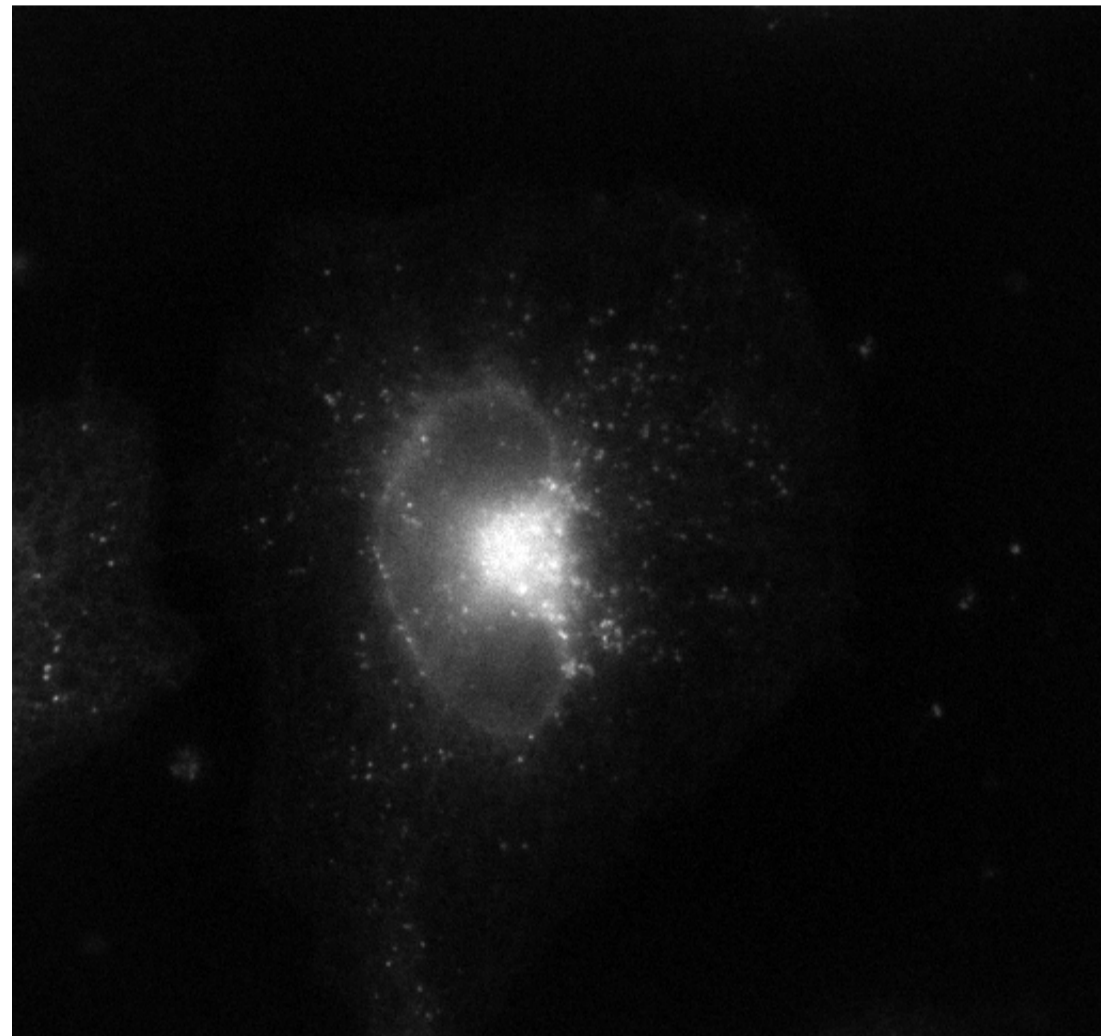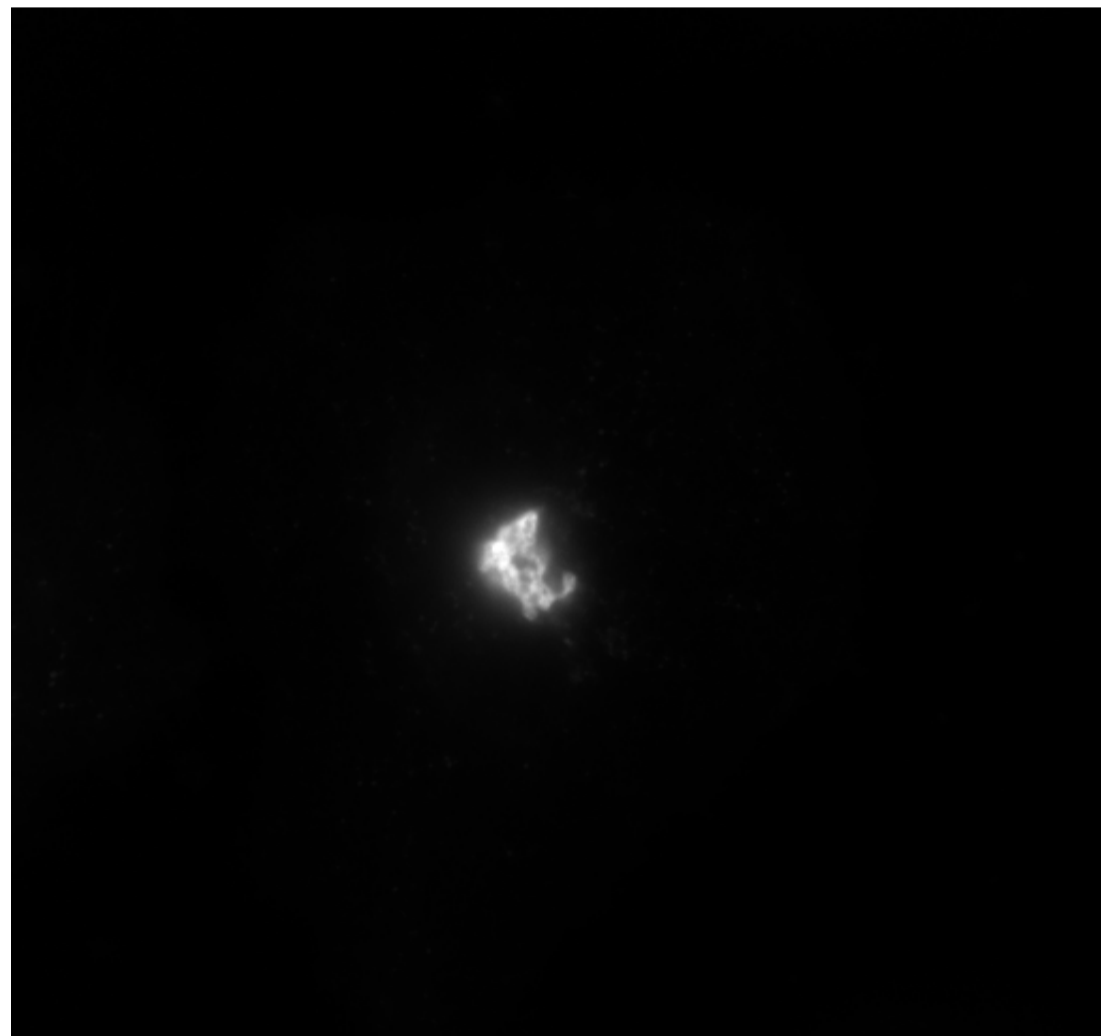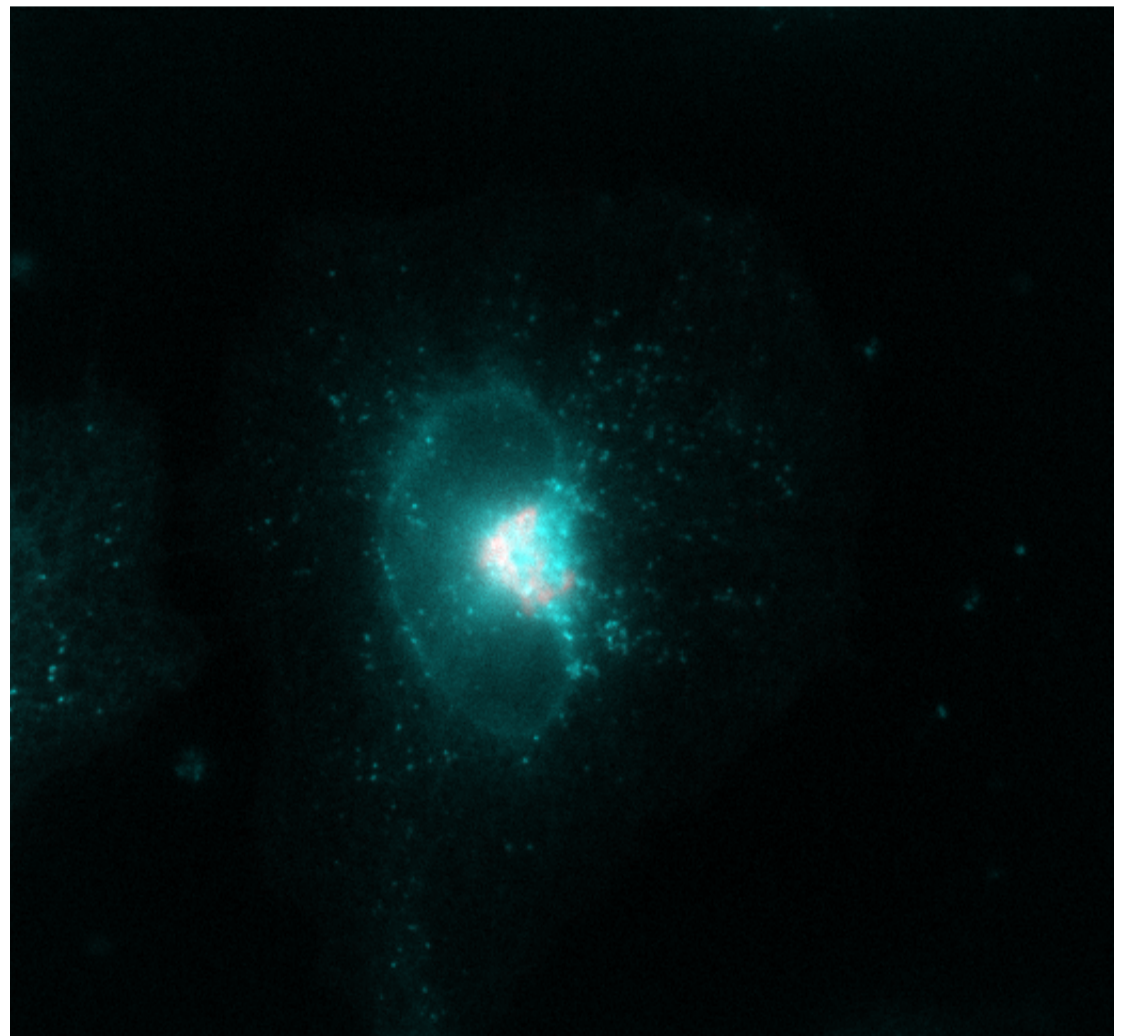

165 min  
CD4-YFP

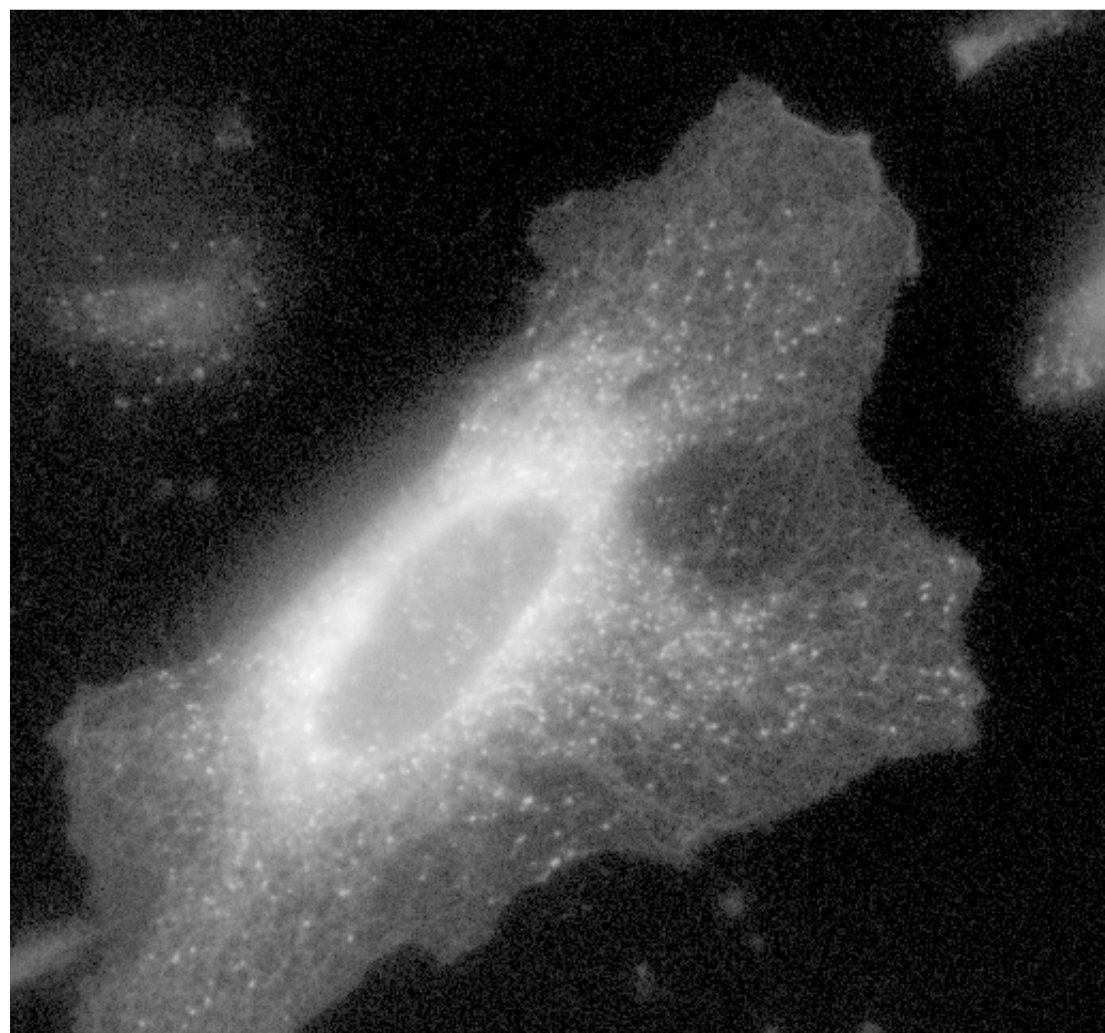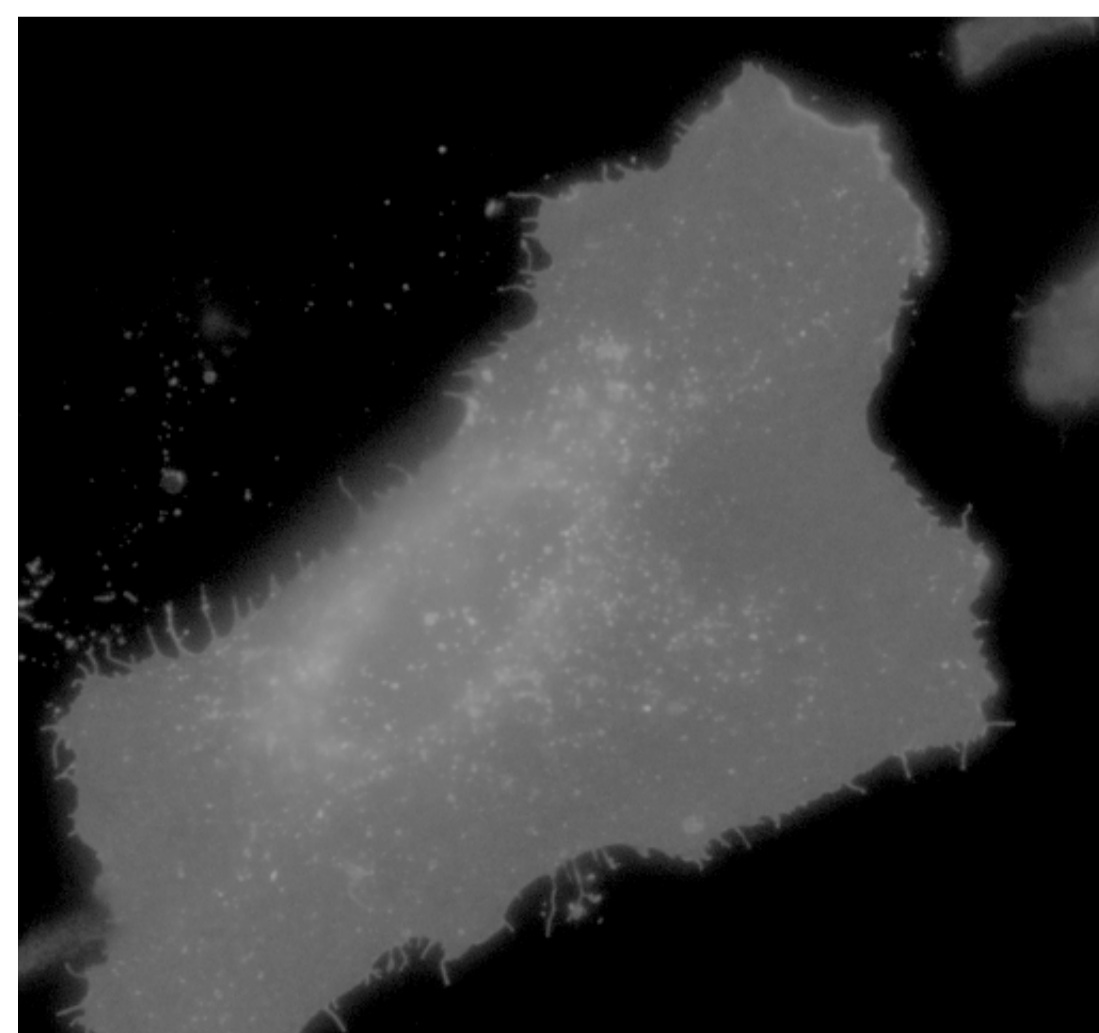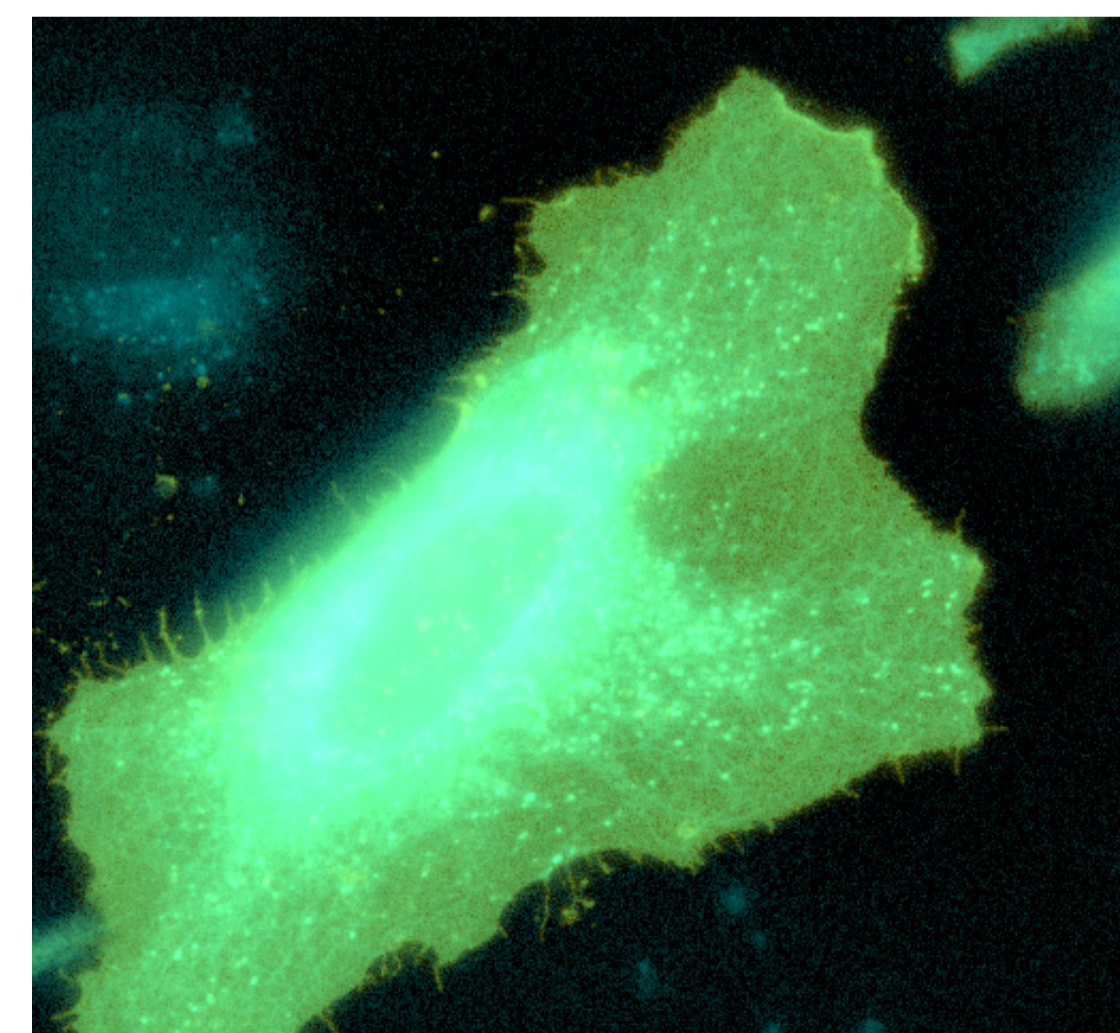

Supplement: supp [file elife-45421-supp-v1.zip › elife_poa_e45421_Figure_3_figure_supplement_1.pdf]

**A**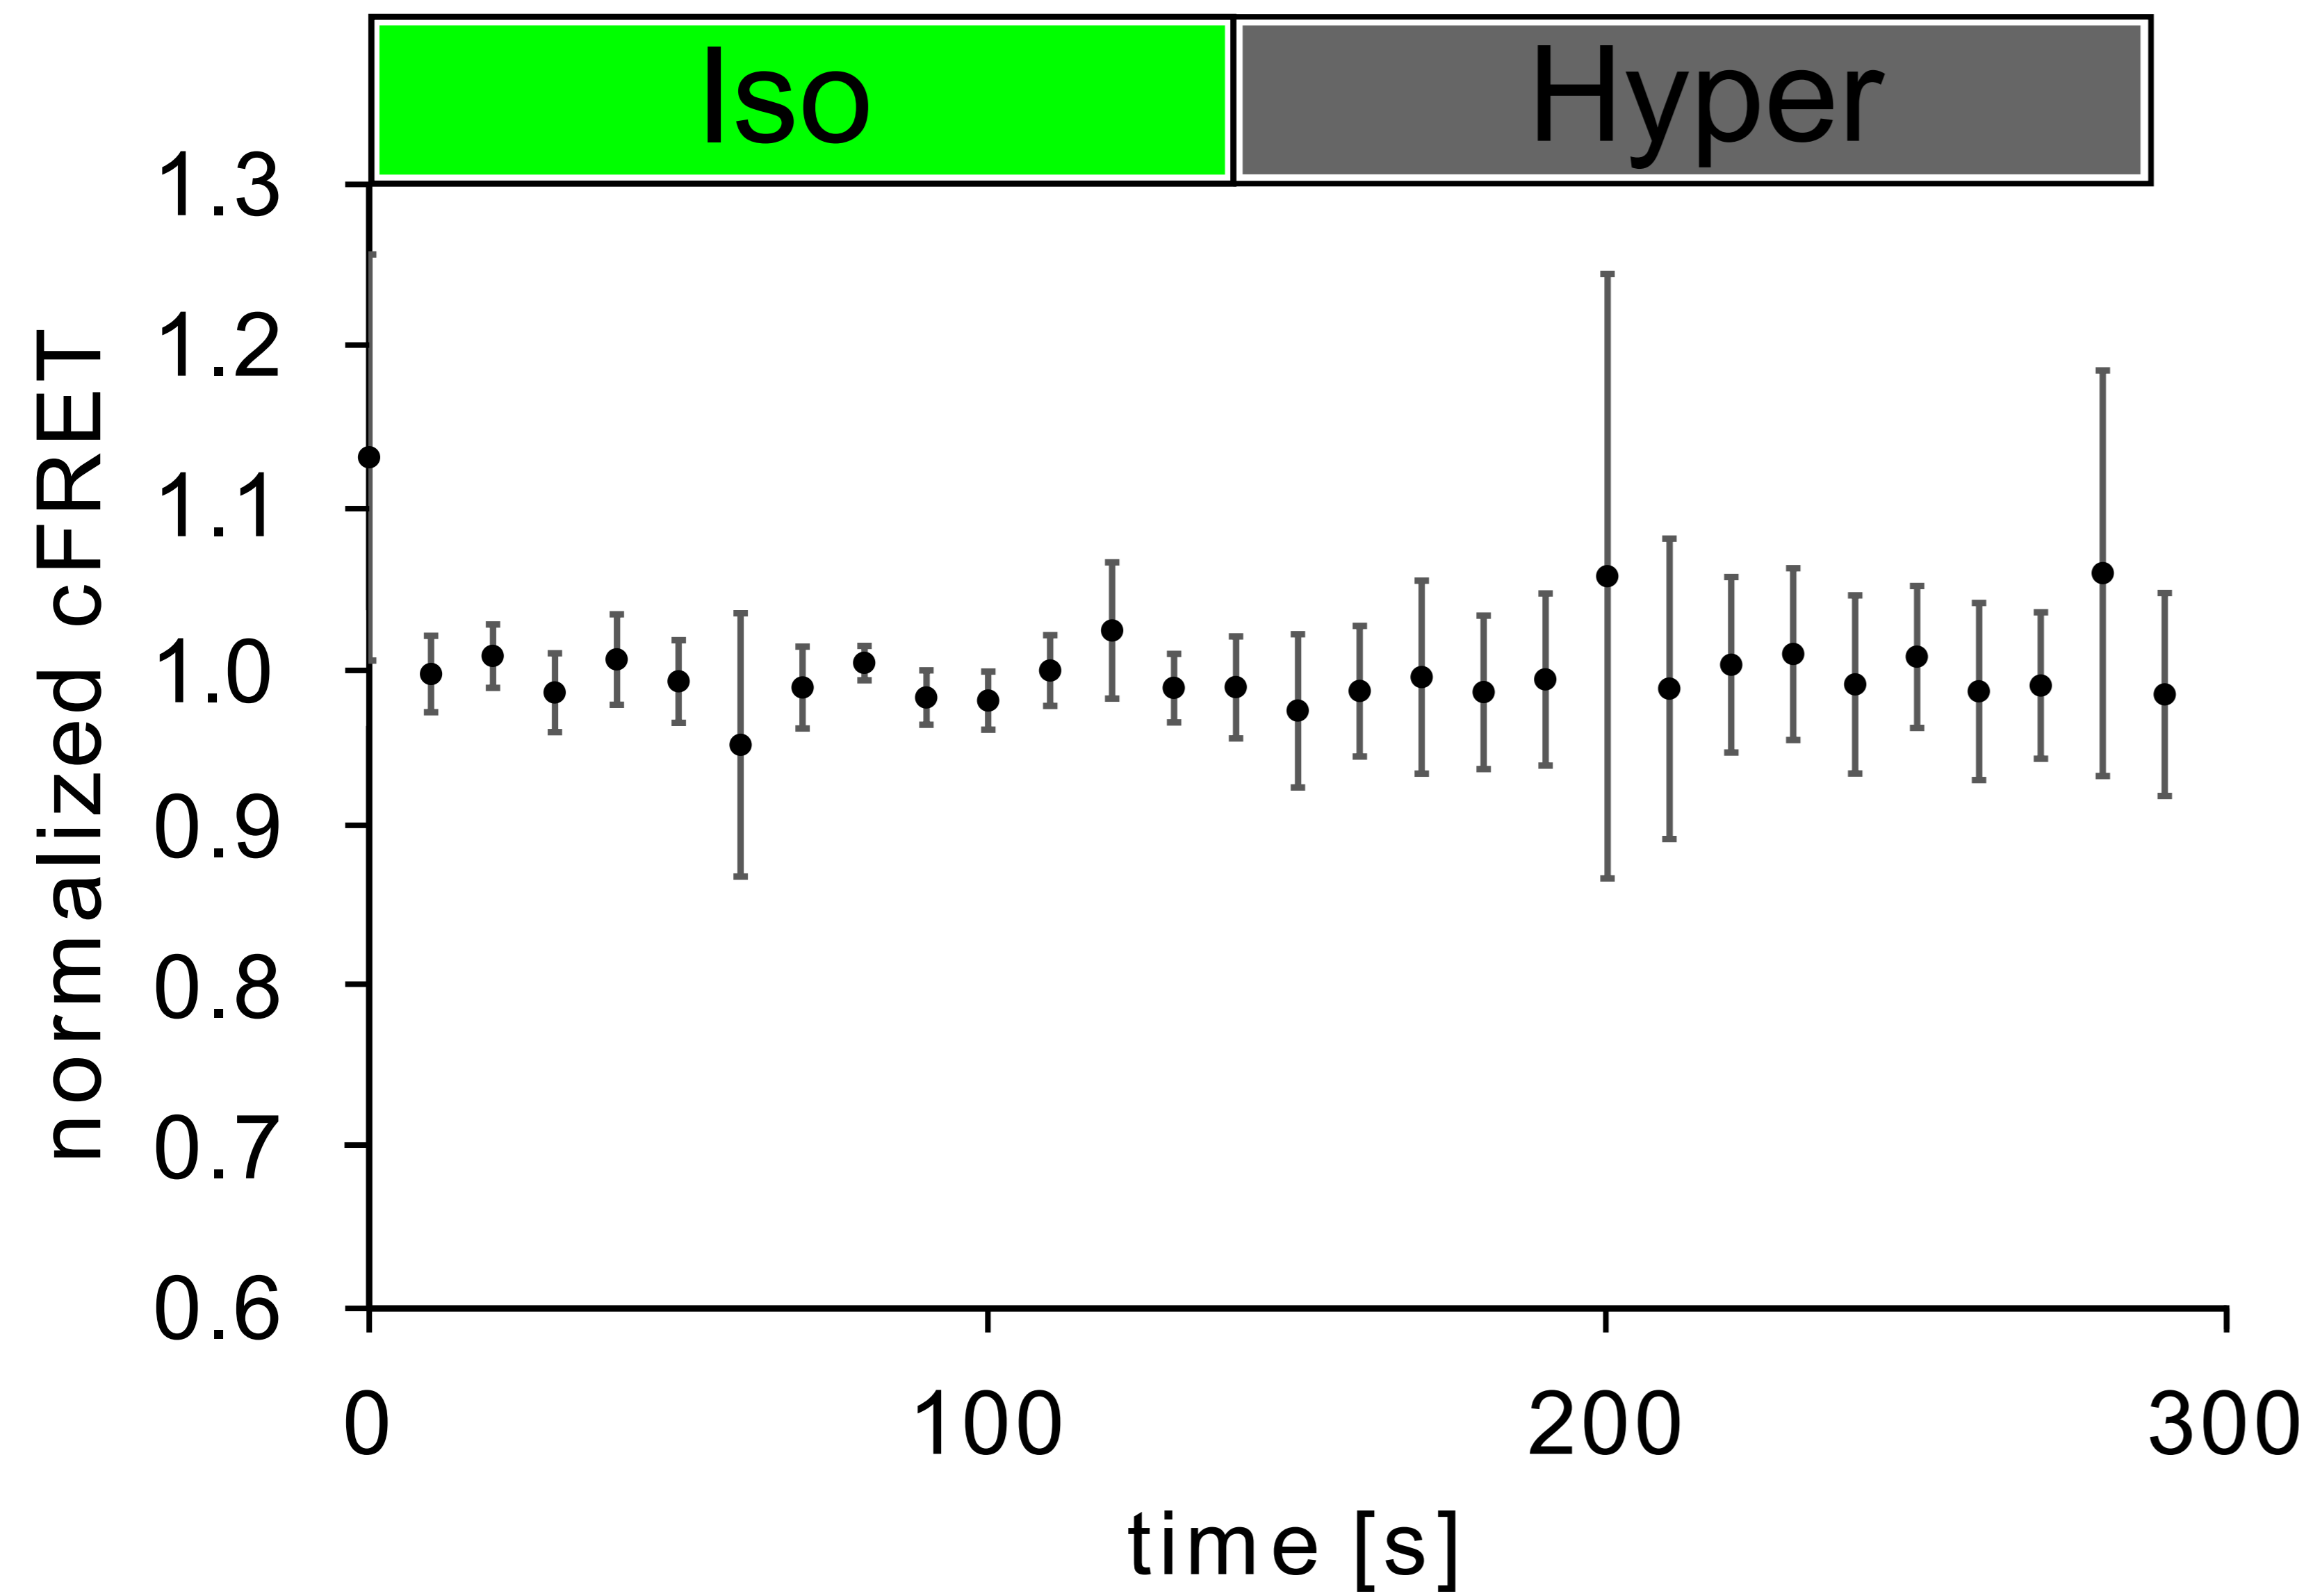**B**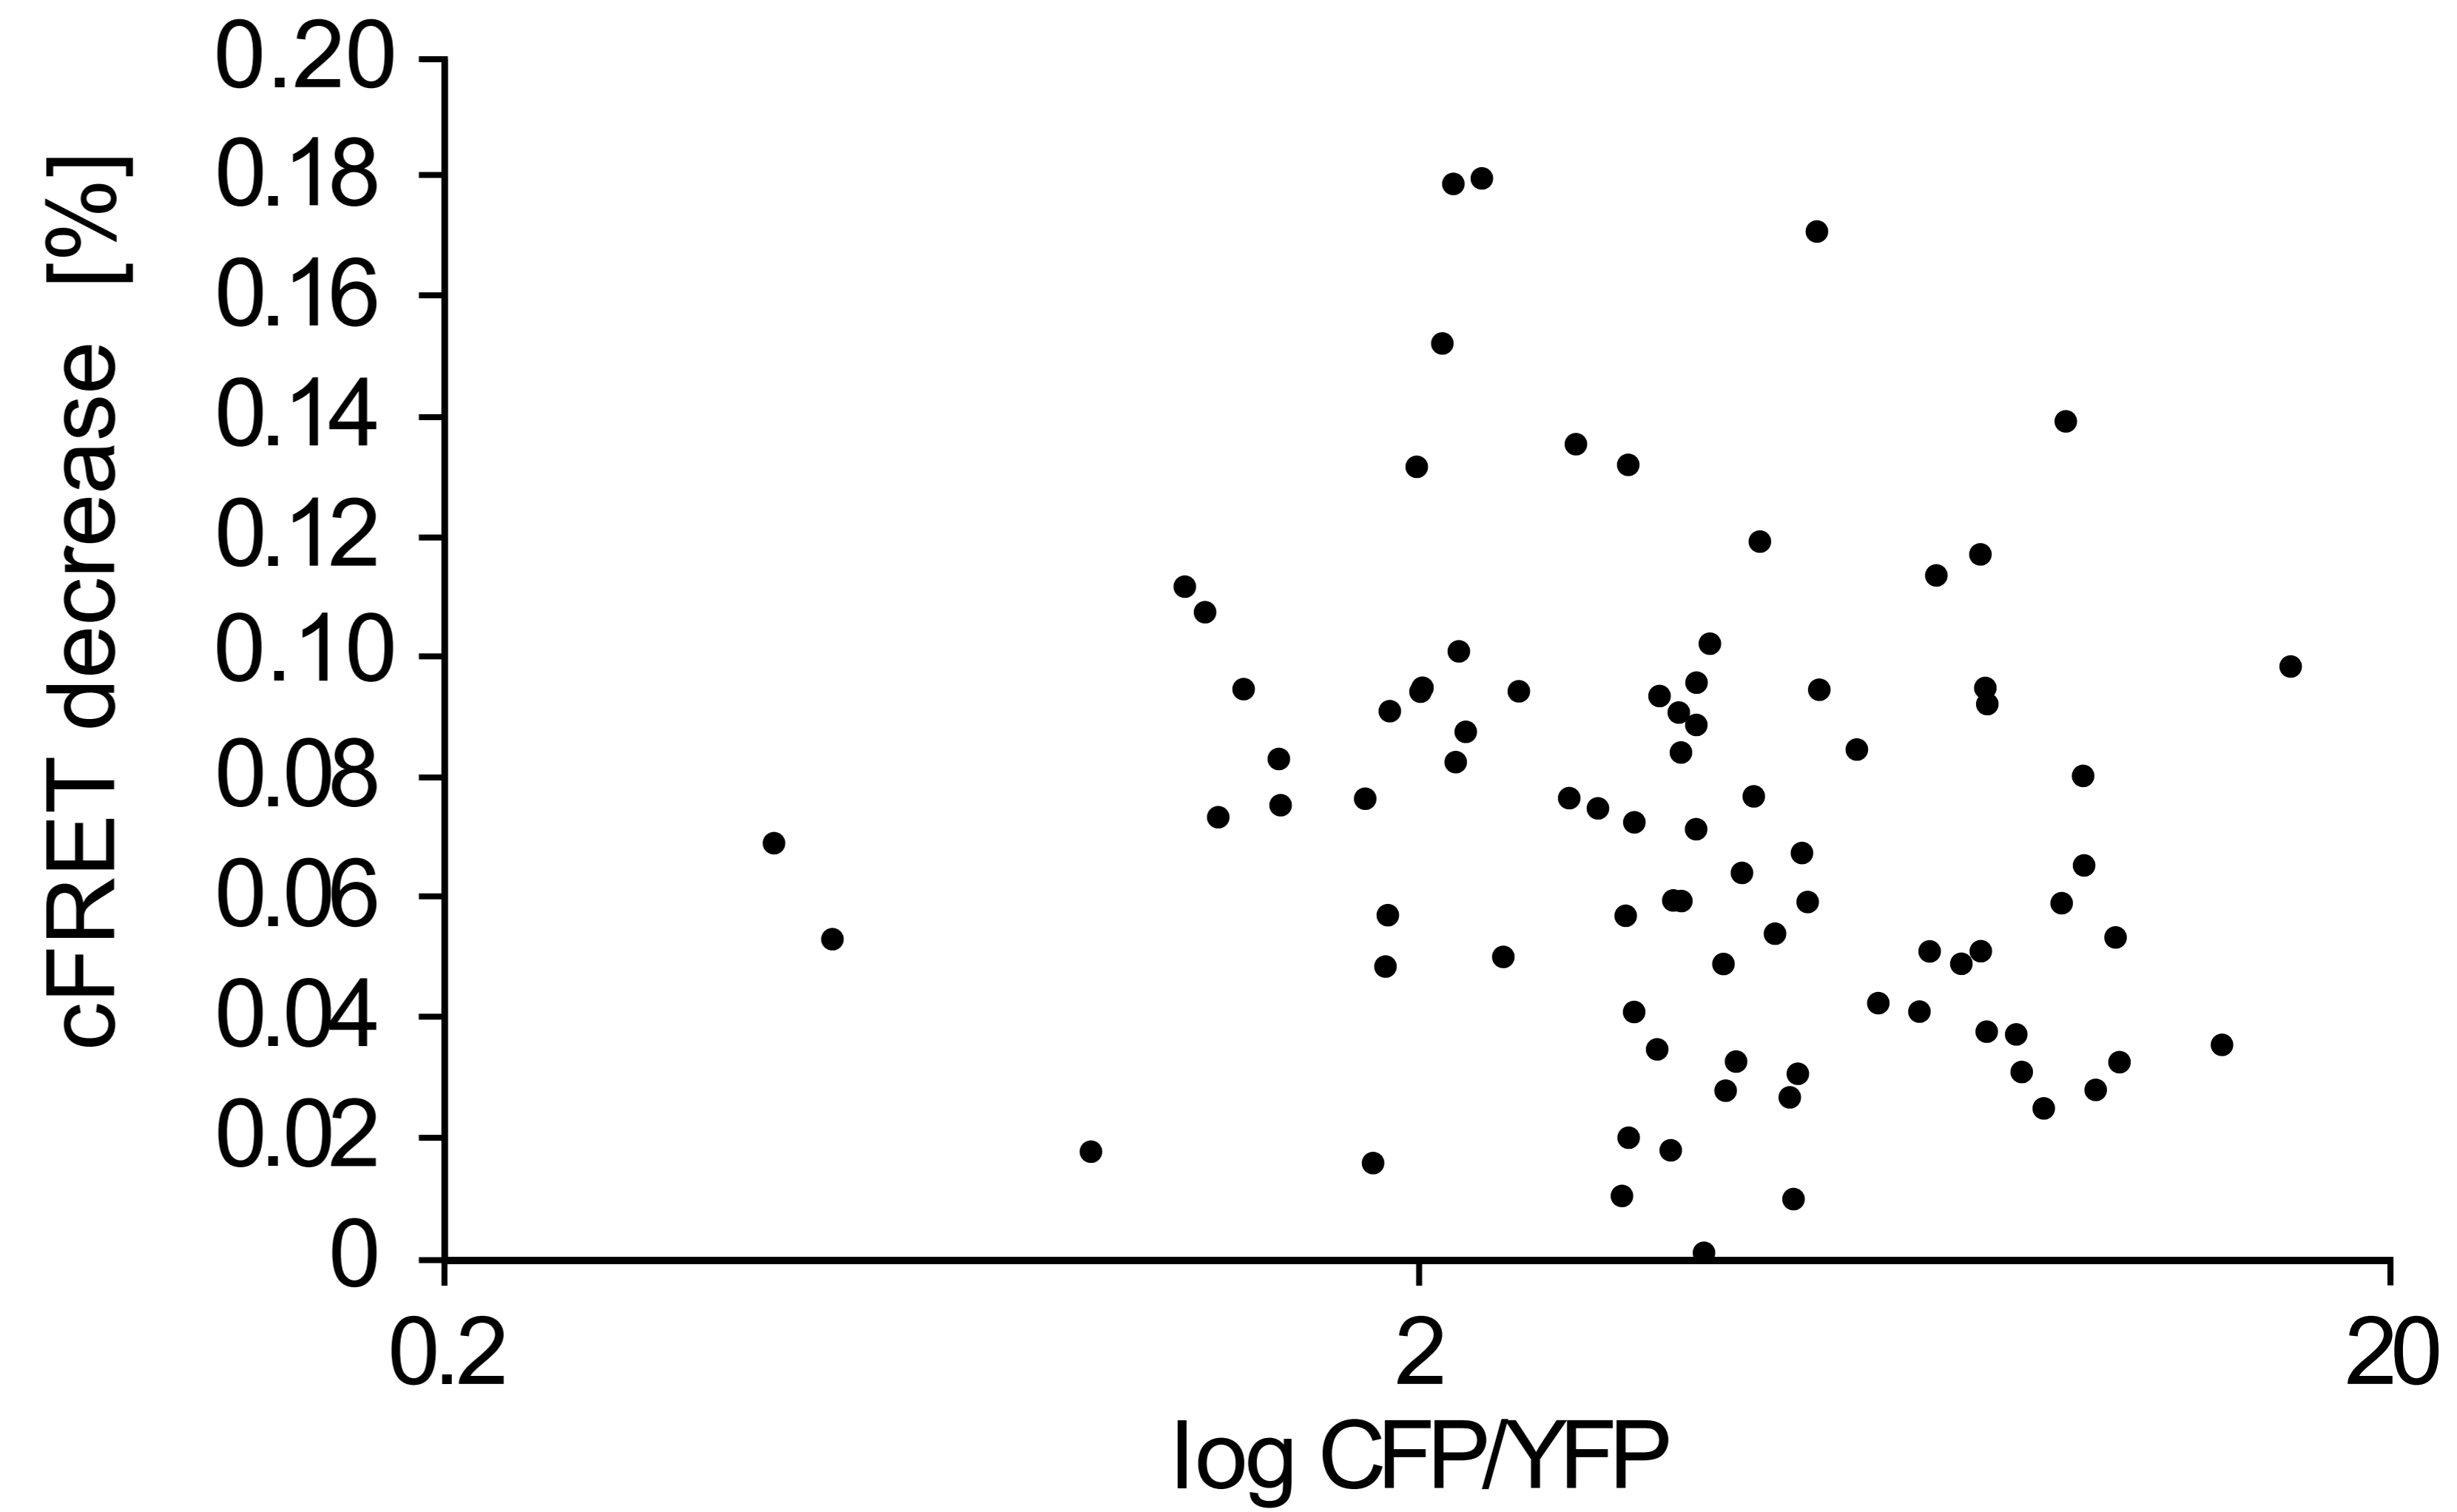

Supplement: supp [file elife-45421-supp-v1.zip › elife_poa_e45421_Figure_1_figure_supplement_2.pdf]
